# Supplementary material for: Prospective study of factors associated with asthma attack recurrence (ATTACK) in children from three Ecuadorian cities during COVID-19: a study protocol
Source: PubMed Central journal article supplement (PMC9207574; doi:10.1136/bmjopen-2021-056295), 2022-06-16
Supplement: bmjopen-2021-056295.draft_revisions.pdf [file bmjopen-2021-056295.draft_revisions.pdf]

# BMJ Open

BMJ Open is committed to open peer review. As part of this commitment we make the peer review history of every article we publish publicly available.

When an article is published we post the peer reviewers' comments and the authors' responses online. We also post the versions of the paper that were used during peer review. These are the versions that the peer review comments apply to.

The versions of the paper that follow are the versions that were submitted during the peer review process. They are not the versions of record or the final published versions. They should not be cited or distributed as the published version of this manuscript.

BMJ Open is an open access journal and the full, final, typeset and author-corrected version of record of the manuscript is available on our site with no access controls, subscription charges or pay-per-view fees (<http://bmjopen.bmj.com>).

If you have any questions on BMJ Open's open peer review process please email [info.bmjopen@bmj.com](mailto:info.bmjopen@bmj.com)

# BMJ Open

## A prospective study of factors associated with asthma attack recurrence in children from three Ecuadorian cities during Covid-19: the Asthma Attacks study (ATTACK)

|                               |                                                                                                                                                                                                                                                                                                                                                                                                                                                                                                                                                                                                                                                                                                                                                                                                                                                                                                                                                                                                                                                                                                |
|-------------------------------|------------------------------------------------------------------------------------------------------------------------------------------------------------------------------------------------------------------------------------------------------------------------------------------------------------------------------------------------------------------------------------------------------------------------------------------------------------------------------------------------------------------------------------------------------------------------------------------------------------------------------------------------------------------------------------------------------------------------------------------------------------------------------------------------------------------------------------------------------------------------------------------------------------------------------------------------------------------------------------------------------------------------------------------------------------------------------------------------|
| Journal:                      | <i>BMJ Open</i>                                                                                                                                                                                                                                                                                                                                                                                                                                                                                                                                                                                                                                                                                                                                                                                                                                                                                                                                                                                                                                                                                |
| Manuscript ID                 | bmjopen-2021-056295                                                                                                                                                                                                                                                                                                                                                                                                                                                                                                                                                                                                                                                                                                                                                                                                                                                                                                                                                                                                                                                                            |
| Article Type:                 | Protocol                                                                                                                                                                                                                                                                                                                                                                                                                                                                                                                                                                                                                                                                                                                                                                                                                                                                                                                                                                                                                                                                                       |
| Date Submitted by the Author: | 11-Aug-2021                                                                                                                                                                                                                                                                                                                                                                                                                                                                                                                                                                                                                                                                                                                                                                                                                                                                                                                                                                                                                                                                                    |
| Complete List of Authors:     | Morillo, Diana; Universidad Internacional del Ecuador<br>Mena-Bucheli, Santiago; Universidad Internacional del Ecuador<br>Ochoa, Angélica; Universidad de Cuenca<br>Chico, Martha E; Universidad Internacional del Ecuador<br>Rodas, Claudia; Universidad de Azuay<br>Maldonado, Augusto; Universidad San Francisco de Quito; Hospital General Docente Calderón<br>Arteaga, Karen; Hospital Verdi Cevallos Balda<br>Rodriguez, Alejandro<br>Figueiredo, Camila; Universidade Federal da Bahia<br>Ardura-Garcia, Cristina; University of Bern<br>Bachmann, Max; Univeristy of East Anglia, Norwich Medical School, University of East Anglia<br>Perkin, Michael; St George's, Population Health Research Institute<br>Chis Ster, Irina; St. George's University of London; St George's University of London<br>Cruz, Alvaro; Universidade Federal da Bahia<br>Romero, Natalia; Universidad Internacional del Ecuador, Quito, School of Medicine; Grups de Recerca d'America i Africa Llatines, GRAAL<br>Cooper, Philip; Universidad Internacional del Ecuador; St George's University of London |
| Keywords:                     | Asthma < THORACIC MEDICINE, COVID-19, Epidemiology < THORACIC MEDICINE                                                                                                                                                                                                                                                                                                                                                                                                                                                                                                                                                                                                                                                                                                                                                                                                                                                                                                                                                                                                                         |
|                               |                                                                                                                                                                                                                                                                                                                                                                                                                                                                                                                                                                                                                                                                                                                                                                                                                                                                                                                                                                                                                                                                                                |

SCHOLARONE™  
Manuscripts

1  
2  
3  
4 **Title:** A prospective study of factors associated with asthma attack recurrence in  
5 children from three Ecuadorian cities during Covid-19: the Asthma Attacks study  
6 (ATTACK)  
7  
8  
9

### 11 **Authors**

12 Diana Morillo<sup>1</sup>, Santiago Mena-Bucheli<sup>1</sup>, Angélica Ochoa<sup>2</sup>, Martha E Chico<sup>1</sup>, Claudia  
13 Rodas<sup>3</sup>, Augusto Maldonado <sup>4,5</sup>, Karen Arteaga<sup>6</sup>, Alejandro Rodriguez<sup>1</sup>, Camila  
14 Figueiredo<sup>7</sup>, Cristina Ardura-Garcia<sup>8</sup>, Max Bachmann<sup>9</sup>, Michael Perkin<sup>10</sup>, Irina Chis  
15 Ster<sup>10</sup>, Alvaro A Cruz<sup>7, 11</sup>, \*Natalia Romero<sup>1,12</sup>, \*Philip J Cooper <sup>1,10</sup>  
16  
17  
18  
19  
20  
21

### 22 **Affiliations**

23  
24 <sup>1</sup> Universidad Internacional del Ecuador, Quito, Ecuador.

25  
26 <sup>2</sup> Universidad de Cuenca, Cuenca, Ecuador.

27  
28 <sup>3</sup> Universidad de Azuay, Cuenca, Ecuador

29  
30 <sup>4</sup> Universidad San Francisco de Quito, Quito, Ecuador

31  
32 <sup>5</sup> Hospital General Docente Calderón, Quito, Ecuador

33  
34 <sup>6</sup> Hospital Verdi Cevallos Balda, Portoviejo, Ecuador

35  
36 <sup>7</sup> Universidade Federal da Bahia, Salvador, Brazil

37  
38 <sup>8</sup>Institute of Social and Preventive Medicine, University of Bern, Bern, Switzerland.

39  
40 <sup>9</sup> University of East Anglia, Norwich, UK.

41  
42 <sup>10</sup> St George's University of London, London, UK.

43  
44 <sup>11</sup>ProAR-Center of Excellence in Asthma, Salvador, Brazil

45  
46 <sup>12</sup>Grups de Recerca d'Amèrica i Àfrica Llatines GRAAL, Barcelona, Spain  
47

48 \*Contributed equally  
49

### 50 **Correspondence**

51  
52 Philip J. Cooper, Escuela de Medicina, Universidad Internacional del Ecuador, Av. Jorge  
53 Fernández y Av. Simon Bolivar, Quito, Ecuador.  
54

55 Email: [pcooper@sgul.ac.uk](mailto:pcooper@sgul.ac.uk)  
56

### 57 **Word count**

58  
59  
60

1  
2  
3  
4 Abstract: 282  
5 Text: 3,782  
6  
7  
8  
9  
10  
11  
12  
13  
14  
15  
16  
17  
18  
19  
20  
21  
22  
23  
24  
25  
26  
27  
28  
29  
30  
31  
32  
33  
34  
35  
36  
37  
38  
39  
40  
41  
42  
43  
44  
45  
46  
47  
48  
49  
50  
51  
52  
53  
54  
55  
56  
57  
58  
59  
60

### Strengths and limitations of this study

- Asthma attacks are a growing cause of morbidity in children and burden on health systems in low and middle-income countries, and there is limited information on factors associated with asthma attacks in poor urban settings in Latin America.
- This protocol describes a study designed to investigate risk factors associated with recurrence of asthma attacks in children and adolescents living in marginalized settings in three Ecuadorian cities.
- This study is recruiting children and adolescents with uncontrolled asthma symptoms and asthma attacks and following them prospectively for 6 to 12 months to identify factors associated with recurrence of attacks in the context of the Covid-19 pandemic.
- The Covid-19 pandemic has had a major impact on health seeking behaviours while mitigation strategies to control transmission of the novel coronavirus, SARS-CoV-2, have resulted in marked declines in the circulation of respiratory viruses that are considered to underlie a high proportion of asthma attacks. Such factors may interfere with recruitment and follow-up of study participants.

## Abstract

**Introduction:** Asthma is a growing health problem in children living in marginalized urban settings in low and middle-income countries. Asthma attacks are an important cause of emergency care attendance and long-term morbidity. We designed a prospective study, the Asthma Attacks study (ATTACK), to identify factors associated with recurrence of asthma attacks among children and adolescents attending emergency care in three Ecuadorian cities.

**Methods and analysis:** Prospective clinical cohort study designed to identify risk factors associated with recurrence of asthma attacks (or exacerbations) in 450 children and adolescents aged 5 to 17 years attending emergency care in public hospitals in three Ecuadorian cities (Quito, Cuenca, and Portoviejo). The primary outcome will be rate of asthma attack recurrence during 6 to 12 months of follow-up. Data are being collected at baseline and during follow-up by questionnaire: sociodemographic data, asthma history and management (baseline only); recurrence of asthma symptoms and attacks (monthly); economic costs of asthma to family; Asthma Control Test; Pediatric Asthma Quality of life Questionnaire; and Newcastle Asthma Knowledge Questionnaire (baseline only). In addition, the following are being measured at baseline and during follow-up: lung function and reversibility by spirometry before and after salbutamol; fractional exhaled nitric oxide (FeNO); and presence of IgG antibodies to SARS-CoV-2 in blood. Recruitment started in 2019 but because of severe disruption to emergency health services caused by the Covid-19 pandemic, eligibility criteria were modified to include asthmatic children with uncontrolled symptoms and registered with collaborating hospitals. Data will be analysed using logistic regression and survival analyses.

**Ethics and dissemination:** The study results will be disseminated through presentations at conferences and to key stakeholder groups including policy makers, postgraduate student theses, peer-review publications, and on a study website.

## Introduction

Asthma is the most common chronic disease of childhood and is estimated to affect more than 350 million people worldwide [1]. Although initially described as a disease of high-income countries (HICs) such as the United Kingdom, international comparisons using standardized methodologies have shown a similar or greater prevalence among children in urban centres in Latin America as observed in HICs [2]. There is evidence that the prevalence of asthma has increased in low- and middle-income countries (LMICs) over recent decades [2].

Asthma attacks or exacerbations are frequent in children and are a common cause of hospitalization [3], most frequently associated with respiratory viral infections [4], but also with exposures to allergens [5] and air pollution [6] among individuals with an underlying genetic susceptibility [7]. Asthma is an underdiagnosed disease because of lack of specialized personnel and resources to evaluate lung function. Further, limited access to specialized care and treatment [8], accompanied by poor treatment adherence [9,10] are important contributing factors to inadequate disease control and attacks, especially in underprivileged populations. In such settings, asthma patients with poor control of their daily symptoms often rely on emergency room care for management of their symptoms [11], resulting in high economic costs to health systems and patients' families [8,12].

To understand better factors contributing to the risk of asthma attacks, it is important identify those factors contributing to suboptimal management which can be improved through better health care [13]. Several studies have investigated potential predictors of recurrence of asthma attacks among children attending emergency services. Factors identified as important included a history of previous emergency attendances for acute asthma attacks, younger age [13–15], ethnicity of African descent [16,17], and low socioeconomic status [13,18]. These studies were conducted almost exclusively in North America and frequently included adult Hispanic populations living there. There are relatively few such studies done in LMICs [13,16,18].

1  
2  
3  
4 The Asthma Attacks Study (ATTACK) aims to identify factors related to recurrence of  
5 asthma attacks in Ecuadorian children attending emergency care in three Ecuadorian  
6 cities. Recruitment into the study started in March 2019 but was interrupted by the  
7 Covid-19 pandemic that had a major impact on use of and access to emergency care  
8 [19]. In consequence, the original protocol was modified to allow continued  
9 recruitment and measure the impact of the Covid-19 pandemic and exposures to SARS-  
10 CoV-2 on asthma attacks in children and adolescents.  
11  
12  
13  
14  
15  
16  
17  
18

19 *What is known about factors related to asthma attacks and impact of COVID-19*  
20 *pandemic?*  
21

22 Severe asthma in children is associated with loss of lung function [20], as well as with  
23 high costs of medical and family care [2]. In Latin America, asthma has been described  
24 as a major public health problem because of a high prevalence and significant  
25 associated morbidity and mortality [21]. Asthma control among children in Latin  
26 America has been reported to be among the worse worldwide [22–25]. The Latin  
27 America Asthma Insights and Management study reported adequate asthma control  
28 in less than 20% of asthmatic children in Argentina, Brazil, Mexico, Venezuela, and  
29 Puerto Rico [22]. A case-control study of asthmatic children with an acute attack  
30 attending an Emergency Room (ER) in coastal Ecuador showed that, over the previous  
31 12 months, only 20% of children had visited a doctor in the past year, 86% had  
32 attended an emergency room at least once prior, and none were receiving inhaled  
33 corticosteroids despite over half having suffered four or more acute exacerbations  
34 [26]. A previous prospective study of children with asthma attacks in coastal Ecuador  
35 showed a recurrence rate of 46% within 6 months [13].  
36  
37  
38  
39  
40  
41  
42  
43  
44  
45  
46  
47  
48  
49

50 Asthma attacks represent an acute or subacute increase in respiratory symptoms [25]  
51 and severe attacks - defined as requiring ER or hospital care and treatment with  
52 systemic corticosteroids for at least 3 days - are associated with loss of lung function  
53 [20] and high economic costs to the patient's family and health care system [7], as well  
54 as absenteeism in work and school.  
55  
56  
57  
58  
59  
60



1  
2  
3  
4 Asthma attacks may be prevented either by avoiding previously identified triggers or  
5  
6 by appropriate preventive treatment. Patients using inhaled corticosteroids (ICS) were  
7  
8 3 times more likely to have well-controlled asthma [22], a reduction in symptoms  
9  
10 independent of frequency, and better lung function [1]. In Brazil, preventive strategies  
11  
12 have been successfully implemented through asthma control programs such as Pro-AR  
13  
14 in Salvador de Bahía to reduce future risk in asthmatic patients from less privileged  
15  
16 backgrounds, through the provision of ICS [27]. There has been a shift to using ICS more  
17  
18 widely for control of asthma, for example, through the provision of combination  
19  
20 inhalers including both ICS and a beta<sub>2</sub> agonist for moderate to severe asthma [28].  
21  
22 More recent evidence indicate that the use of ICS may be beneficial even for asthmatic  
23  
24 children with mild disease that accounts for 30-40% of severe attacks [29]. Treatment  
25  
26 recommendations for children and adolescents with mild disease are now shifting to  
27  
28 use of ICS (plus long-acting beta-agonists in combination inhalers) as required [30,31].  
29  
30 Despite such initiatives, access to ICS in many LMIC settings is limited within health  
31  
32 care systems because of cost and a failure to recognize the public health impact of  
33  
34 childhood asthma. In such settings, children with asthma symptoms frequently over-  
35  
36 rely on ER care for the acute control of their symptoms in the absence of adequate  
37  
38 provision of specialized care for their long-term management [26,32].

39  
40 Soon after the emergence of the novel coronavirus, SARS-CoV-2, in humans and its  
41  
42 spread into a global pandemic, the question was raised as to whether this novel viral  
43  
44 infection might alter the risk of asthma symptoms because of deficient antiviral  
45  
46 immune responses and the tendency to increase exacerbations during infections with  
47  
48 other respiratory viruses [33]. To date, evidence from studies of asthmatic children and  
49  
50 adults do not indicate an increased risk [34,35]. Characteristics of asthmatic airways  
51  
52 among those with T2-linked phenotypes may reduce the expression of the cellular  
53  
54 receptor for SARS-CoV-2, angiotensin-converting enzyme 2 (ACE2), in the airways [36].  
55  
56 It has been suggested that the use of ICS among asthmatics may reduce risk of severe  
57  
58 Covid-19 by suppressing inflammation and enhancing antiviral defenses [37], although  
59  
60 the evidence remains unclear [38] and there are very limited data from pediatric  
populations [38]. The Covid-19 pandemic has resulted in marked reductions in hospital

1  
2  
3  
4 visits including to emergency rooms (Figure 1), reduced attack rates, and better lung  
5 function among children with asthma [19,39], which are likely consequences of  
6 mitigation measures to reduce transmission of SARS-CoV-2 (such as lockdowns, face  
7 masks, and social distancing) that have resulted also in the reduced transmission of  
8 other respiratory viruses [4,6,10,39]. Treatment adherence may have improved also  
9 because of better parental supervision of asthma medications [40]. There are limited  
10 data on the impact of exposure to SARS-CoV-2 on asthma attacks and uncontrolled  
11 symptoms and the impact of the collateral effects of the Covid-19 pandemic including  
12 reduced access to health services and medications and effects of Covid-19 mitigation  
13 efforts in resource-poor LMIC settings.  
14  
15  
16  
17  
18  
19  
20  
21  
22  
23

24 **Figure 1: Impact of the COVID-19 pandemic in the 3 study centres in Quito, Portoviejo**  
25 **and Cuenca, Ecuador, on recruitment rates into the study and number of potentially**  
26 **eligible subjects identified in collaborating emergency rooms. Red bars show**  
27 **numbers recruited as a proportion (%) of those eligible (blue bars) prior to a legally**  
28 **enforced national lockdown on 16<sup>th</sup> March 2020.**  
29  
30  
31  
32  
33

## 34 **Methods and analysis**

### 35 *The Asthma Attack study*

36  
37 A prospective multi-center study is being done in children aged 5 to 17 years in low-  
38 income settings in three Ecuadorian cities (Quito, Cuenca, and Portoviejo) to study  
39 factors associated with acute asthma attacks. Because of the impact of the Covid-19  
40 pandemic on risk of asthma attacks and health care access, the study was divided into  
41 2 phases of recruitment and follow-up: 1) Phase I (or pre-Covid-19 from May 2019 to  
42 March 2020) evaluated risk factors associated with recurrence of acute asthma attacks  
43 among children and adolescents attending emergency rooms of public hospitals in low-  
44 income settings in the three cities; and 2) Phase II (or peri-COVID-19 from March 2021  
45 to March 2022) is evaluating risk factors associated with attacks among children and  
46 adolescents with asthma and current symptoms who have previously attended  
47 specialist care at public hospitals in Cuenca and Portoviejo. Phase II is also evaluating  
48 the effects of exposures to SARS-CoV-2 on asthma attacks and symptoms. In addition,  
49  
50  
51  
52  
53  
54  
55  
56  
57  
58  
59  
60

1  
2  
3  
4 both study phases are evaluating the impact of asthma, and adequate management  
5 and control of asthma, on the quality of life and economic costs for the family of  
6 children and adolescents with asthma. Qualitative studies of health worker's  
7 perspectives on asthma care coordination between primary and specialized health  
8 care are being done also as described elsewhere.  
9  
10  
11  
12  
13  
14

### 15 *Study design and setting*

16 This is a multi-center prospective study conducted in three Ecuadorian cities (Quito,  
17 Cuenca, and Portoviejo). Quito, the capital, and Cuenca, the third largest city, are  
18 located in the Andean highlands (altitude >2,500m) where the annual average  
19 temperature is ~16°C, while Portoviejo is in the coastal region (at sea level) with an  
20 annual average temperature of ~25 °C [41]. According to the 2010 census, the  
21 populations of the three cities are: Quito >2 million, Cuenca 0.5 million, and Portoviejo  
22 0.28 million inhabitants. Ecuador is an upper-middle-income-country with a per capita  
23 income of \$6,080 in 2019. The health system in Ecuador includes public and private  
24 provision. Public institutions offer universal health coverage that is stratified into  
25 different levels of care from primary to tertiary services [42]. Social security institutions  
26 offer health services to affiliated salaried workers and their families. The private sector  
27 includes for-profit entities (hospitals, clinics, dispensaries, doctor's offices, pharmacies,  
28 and prepaid health insurance companies) which are generally located in the main cities  
29 [43].  
30  
31  
32  
33  
34  
35  
36  
37  
38  
39  
40  
41  
42  
43  
44

### 45 *Study centers*

46 The study was initially based in the tertiary care hospitals in each of the three cities  
47 (Hospital Docente General de Calderon, Quito; Hospital Vicente Corral Moscoso,  
48 Cuenca; and Hospital Verdi Cevallos Balda, Portoviejo).  
49  
50  
51  
52  
53

### 54 *Recruitment - Phase I (pre-COVID-19; May 2019 to March 2020)*

55 Children and adolescents aged 5–17 years were either recruited, either while attending  
56 emergency rooms (ERs) with an asthma attack or through daily registries and contact  
57 telephone numbers of patients attending the ERs with an asthma attack. From May  
58  
59  
60

2019, eligible patients (Table 1) were provided with a study information sheet on discharge and their parents were contacted to arrange an interview at a hospital consulting room 10-14 days later when they were recruited into the study after providing informed written parental consent and minor assent (8 years and older).

#### *Recruitment – Phase II (peri-COVID-19; March 2021 to March 2022)*

The Covid-19 pandemic had a dramatic impact on our ability to recruit children with asthma attacks in the three study hospitals that resulted in the suspension of recruitment in March 2020. This was owing to the reassignment of all 3 hospitals to Covid-19-only activities for prolonged periods and the imposition of a legally enforced lockdown nationally. Figure 2 shows the number of potentially eligible children identified in the 3 study hospitals by month in the period prior to Covid-19 and during the pandemic. There was as a marked reduction in eligible children attending the ERs immediately following the imposition of lockdown on 16th March 2020 and in the following 8 months. In the period following the initial lockdown and other mitigation strategies to reduce transmission of SARS-CoV-2, within the sample of asthmatic children recruited into Phase I of the study, there was evidence of dramatic reduction in health service attendance rather than changes in the incidence of attacks [19]. To allow continued recruitment, a second phase (Phase II) of the study was started with eligibility criteria modified to include children and adolescents aged 5-17 years registered as having asthma in patient registries at the study hospitals in Cuenca and Portoviejo (Quito was not included in Phase II because of logistic issues in that specific setting). The child's parent was contacted by telephone and asked about the child's current asthma symptoms. Children with current symptoms were considered eligible. Eligibility criteria for Phase I and II are shown in Table 1.

**Table 1 Eligibility criteria for entry into Phase I and Phase II of study**

| Characteristic           | Phase I                                              | Phase II                                                                  |
|--------------------------|------------------------------------------------------|---------------------------------------------------------------------------|
| Setting/study population | Public hospital ERs in Quito, Cuenca, and Portoviejo | Public hospital registry of patients with asthma in Cuenca and Portoviejo |

|                    |                                                                                                                                                                                                                                                                                                                     |                                                                                                                                                                                                                                                                                               |
|--------------------|---------------------------------------------------------------------------------------------------------------------------------------------------------------------------------------------------------------------------------------------------------------------------------------------------------------------|-----------------------------------------------------------------------------------------------------------------------------------------------------------------------------------------------------------------------------------------------------------------------------------------------|
| Inclusion criteria | <ol style="list-style-type: none"> <li>1. Aged 5-17 years</li> <li><b>2. Acute asthma attack attending ERs at public hospitals</b></li> <li>3. Living within 12 km of public hospital</li> <li>4. Informed written consent from parents</li> <li>5. Minor assent from children <math>\geq 8</math> years</li> </ol> | <ol style="list-style-type: none"> <li>1. Aged 5-17 years</li> <li><b>2. Wheeze within the last 6 months</b></li> <li>3. Living within 12 km of public hospital</li> <li>4. Informed written consent from parents</li> <li>5. Minor assent from children <math>\geq 8</math> years</li> </ol> |
| Exclusion criteria | <ol style="list-style-type: none"> <li>1. Other chronic disease</li> <li>2. Living <math>&gt;12</math> km from public hospital</li> </ol>                                                                                                                                                                           | <ol style="list-style-type: none"> <li>1. Other chronic disease</li> <li>2. Living <math>&gt;12</math> km from public hospital</li> </ol>                                                                                                                                                     |

### *Data collection*

A study manager supervised day-to-day activities of a dedicated teams (physician and nurse) of trained study personnel based in each of the public hospitals. Each participant was followed up for 12 months in Phase I and at least 6 months in Phase II. Standardized procedures were used throughout (Figure 2). Subjects were evaluated at monthly intervals using face-to-face and telemonitoring for follow-up. Both phases include face-to-face evaluations (evaluations at baseline, 2, 4, 6, 9, and 12 months in Phase I; baseline, 6, and 12 months in Phase II). Between March 2020 and March 2021, all face-to-face evaluations in Phase I were changed to telemonitoring apart from the final evaluation at 12 months which remained face-to-face, where possible. Final face-to-face evaluations were done in March-April 2021 on participants who had completed 12 months of follow-up between June 2019 and February 2020. The site of face-to-face evaluations was changed to either a clinic or home visit depending on the preference of the child's parents. Study procedures were the same in both phases of the study (Figure 2) with the following exceptions: 1) procedures requiring face-to-face evaluations at 6 and 12 months in Phase I (C-ACT, and PAQLQ) were dropped in Phase II and the remaining instruments were administered by telemonitoring; 2) blood samples (baseline, 6, and 12 months) are being collected from those recruited into Phase II of the study for measurement of anti-SARS-CoV-2 IgG antibodies; and 3)

1  
2  
3  
4 measurement of lung function and fractional exhaled nitric oxide was suspended from  
5 March 2020 because of risks from potentially hazardous infectious aerosols until a time  
6 when this procedure can be done safely. Medications (inhaled salbutamol and  
7 fluticasone) were provided free of charge to participants when prescribed by a hospital  
8 physician and there was no medication in the hospital pharmacy. The study team  
9 ensured adequate inhaler technique during face-to-face clinic or home visits. Study  
10 personnel did not interfere with treatment indications of hospital staff.  
11  
12  
13  
14  
15  
16  
17  
18

19 **Figure 2. Study procedures during baseline evaluation and follow-up in Phases I (A)**  
20 **and II (B) of study.**

21  
22 **BaselineQ – General questionnaire based on Phase II of the International Study of**  
23 **Asthma and Allergies in Childhood; AFCQ- Asthma Family Costs Questionnaire; NAKQ**  
24 **– Newcastle Asthma Knowledge Questionnaire; ACT – Asthma Control Questionnaire**  
25 **(>11 years); C-ACT – Child Asthma Control Questionnaire (>=12 years); ARQ – Asthma**  
26 **Recurrence Questionnaire; FeNO – fractional exhaled nitric oxide. Follow-up in Phase**  
27 **I was for 12 months and in Phase II for a minimum of 6 months.**  
28  
29  
30  
31  
32  
33  
34  
35  
36

### 37 *Questionnaires at baseline and follow-up*

38  
39 The following questionnaires were used as indicated in Figure 2; i) asthma  
40 questionnaire to collect information on history of asthma symptoms, treatment and  
41 management, and potential risk factors for asthma attacks. This questionnaire has  
42 been previously adapted from ISAAC Phase II and extensively field-tested for children  
43 and adolescents with asthma [13,26]; ii) Asthma Recurrence Questionnaire (ARQ) -  
44 questionnaire to monitor recurrence of asthma symptoms and monitor treatment  
45 during follow-up [13], and including symptoms and diagnosis of Covid-19 in Phase II;  
46 iii) Childhood Asthma Control Test (C-ACT) [44], completed by the child and parent for  
47 children aged <12 years or the ACT [45] for those aged ≥12 years; iv) Paediatric Asthma  
48 Quality of Life Questionnaire (PAQLQ) [46]; v) Newcastle Asthma Knowledge  
49 Questionnaire (NAKQ) [47,48] validated in a Spanish-speaking populations; and vi)  
50  
51  
52  
53  
54  
55  
56  
57  
58  
59  
60

Asthma Family Cost Questionnaire (AFCQ) [49]. Data collection is summarized in Table 2.

**Table 2 Data collection at baseline and during follow-up in Phases I and II of study**

| Data collected                 | Baseline | Month 6 | Month 12 | Monthly |
|--------------------------------|----------|---------|----------|---------|
| Asthma diagnosis               | I/II     |         |          |         |
| History of asthma symptoms     | I/II     |         |          |         |
| Current asthma symptoms        | I/II     | I/II    | I/II     | I/II    |
| ER visits/ hospitalizations    | I/II     | I/II    | I/II     | I/II    |
| Asthma medications             | I/II     | I/II    | I/II     | I/II    |
| Asthma control (C-ACT/ACT)     | I/II     | (I)/II  | (I)/II   |         |
| Asthma quality of life (PAQLQ) | I/II     | (I)/II  | (I)/II   |         |
| Asthma knowledge (NAKQ)        | I        |         |          |         |
| Lung function                  | I/(II)   | (I/II)  | (I)      |         |
| Reversibility                  | I/(II)   | (I/II)  | (I)      |         |
| FeNO                           | I/II     | (I)/II  | (I)/II   |         |
| Anti-SARS-CoV-2 IgG antibodies | II       | II      | II       |         |
| Covid-19 symptoms or diagnosis | II       | II      | II       | II      |

FeNO – fractional exhaled nitric oxide. (I) – data collection where possible

#### *Lung function test and Fractional Exhaled Nitric Oxide (FeNO)*

Lung function testing is being done according to American Thoracic Society (ATS) criteria using a portable ultrasonic spirometer (EasyOne® device, ndd Medical Technologies). Global Lung Function Initiative (GLI-2012) reference values will be used

1  
2  
3  
4 to calculate z-scores depending on age, sex, height, and ethnicity [50]. Lung function is  
5 being measured before and before and after 200 ug salbutamol administered through  
6 a spacer with a positive test for airways reactivity defined as an increase in FEV<sub>1</sub> of  
7  
8 ≥12%. Fractional exhaled nitric oxide (FeNO) is being measured in parts per billion  
9  
10 using NObreath (Bedfont Scientific, UK). As a consequence of lockdown and mitigation  
11  
12 strategies to prevent transmission of SARS-CoV-2, measurement of lung function and  
13  
14 FeNO was suspended in March 2020. FeNO measurement, a low effort procedure that  
15  
16 carries a minimal risk of generating aerosols [51,52], was resumed in March 2021 for  
17  
18 12-month evaluations in Phase I and baseline evaluations in Phase II. FeNO is being  
19  
20 done following the recommendations of the manufacturer to minimize potential risks  
21  
22 [53]. Spirometry, which often induces cough, will be resumed, only if the procedure  
23  
24 can be done without risk to staff, patients, and their families.  
25  
26  
27

### 28 *Blood samples*

29  
30 Blood sample are being taken at baseline, 6 and 12 months in Phase II. Blood is drawn  
31  
32 from an antecubital vein into a 4 mL plastic tube containing EDTA as anticoagulant  
33  
34 (Vacutainer, BD). After centrifugation, plasma is stored at -20C until analysis. Levels of  
35  
36 IgG specific for SARS-CoV-2 are being measured using a validated enzyme linked  
37  
38 immunosorbent assay [54].  
39  
40

### 41 *Biosafety precautions relating to the COVID-19 pandemic*

42  
43 Personnel gathering data during face-to-face visits have been trained to use  
44  
45 appropriate personal protective equipment according to international guidelines  
46  
47 [55–57]. Immediately prior to a home or clinic visit, the child’s carer is telephoned  
48  
49 about potential symptoms or a COVID-19 diagnosis among family members or close  
50  
51 contacts – if any symptoms are reported the visit is rescheduled after 2 weeks.  
52  
53

### 54 *Sample size considerations*

55  
56 A sample size of 450 patients was proposed for Phase I, based on a binary outcome  
57  
58 variable for recurrence of an asthma attack within 12 months, or not, with an  
59  
60 estimated recurrence rate of about 50% during 6 months follow-up in a similar



1  
2  
3  
4 population in Ecuador [13]. This sample size gives a power of 80% or more, based on  
5 having a minimum of 18 outcome events per explanatory variable (10 or fewer  
6 variables to explain variability in the outcome), allowing for 20% attrition [58–61].  
7  
8 Because we do not expect a multivariable model to exceed 10 predictors, the initial  
9 sample size estimation is unchanged. The definition of an asthma attack in both phases  
10 of the study is an episode of acute wheezing requiring an unscheduled visit to a health  
11 professional (including visits to ERs) and which is controlled by  $\beta_2$ -agonist  
12 bronchodilator treatment. The original definition for an asthma attack in Phase I that  
13 included ER attendance had to be modified in the light of changes in health seeking  
14 behaviour caused by the COVID-19 pandemic and fear of contagion in hospitals and  
15 other acute health facilities [19]. Potential explanatory variables include age, gender,  
16 ethnicity, socioeconomic status, medication use, asthma attacks and use of systemic  
17 corticosteroids in year prior to recruitment, asthma control test score, and study  
18 centre. Given changes to the Phase I protocol, an additional variable (for recruitment  
19 from ERs vs. hospital lists) will be considered as an effect modifier. Sub-group analyses  
20 of Phase II will include SARS-CoV-2 seropositivity as an explanatory variable. Secondary  
21 outcomes will include symptom severity and asthma control score.  
22  
23  
24  
25  
26  
27  
28  
29  
30  
31  
32  
33  
34  
35  
36

### 37 *Statistical analysis*

38  
39 The primary outcome will be the first asthma attack recurrence during 12 months of  
40 follow-up in Phase I and at least 6 months in Phase II. Both logistic regression and  
41 survival analyses will be used. For the latter, if no re-attendance related to an asthma  
42 attack occurred during the follow-up period, the patient is considered (right) censored.  
43 The general assumption for time-to-event (survival analysis) is that the censoring is  
44 non-informative, i.e. it is independent of the events (asthma attacks). Under this  
45 assumption, the results should not be qualitatively different from those inferred from  
46 a logistic regression. Odds ratios and/or hazard ratios will measure the associations  
47 between asthma attack recurrence and explanatory variables.  
48  
49  
50  
51  
52  
53  
54

55 The Cox proportional hazard (PH) semi-parametric technique allows no assumption to  
56 be made on the baseline hazard; nevertheless, proportionality of the hazards should  
57 hold. The latter assumption can be tested on the basis of Schoenfeld residuals after  
58  
59  
60

1  
2  
3  
4 fitting models to the data. If unsatisfactory, alternative parametric models will be  
5 considered after understanding the distributional assumptions on the data such that  
6 the baseline hazard function is modelled appropriately.  
7  
8

9  
10 After exploring the data as described above, a forward-backward elimination survival  
11 analysis would be applied to determine the most parsimonious model for an adjusted  
12 multivariable model; that is the model with the least number of predictors yet  
13 explaining most of the variability in the data. Penalized-likelihood criteria such as AIC  
14 or BIC will be used to choose between non-nested models – nevertheless based on  
15 complete observations only.  
16  
17

18  
19 Hosmer-Lemeshow measure of goodness of fit would be employed for logistic  
20 regression models with a p-value of less than 0.05 indicating a poor fit to the data.  
21 Model validation will be done by splitting the data set into training-testing subsets  
22 (logistic regression setting). Cross validation techniques will be used to understand the  
23 prediction power of the corresponding logistic regression model using area under the  
24 receiver operator curve, prior to propose the model entering the clinical practice with  
25 the view of elaborating a prognostic model. In survival setting it is also possible that  
26 the precise time of the attacks may be missed but recorded as between two time  
27 points. This would fall into interval censored data as an alternative to survival setting  
28 in which the precise time of the event is required.  
29  
30

31  
32 Multiple recurrences of asthma attacks within the follow-up period will generate a  
33 longitudinal binary outcome, with multiple records for each participant over follow-  
34 up. The hierarchical structure of the data requires special inferential techniques which  
35 account for the two sources of variability: that of between participants and within  
36 participants. Three different modelling approaches will be considered: generalized  
37 estimation equation, mixed models, and random effects survival models. The first  
38 approach provides population-average estimates, the second provides subject-specific  
39 estimates while the third is also known as shared frailty survival model. A frailty is a  
40 latent random effect which enters multiplicatively on the hazard function and accounts  
41 for the multiple failures setting and/or for the clustered aspect of the data.  
42  
43

44  
45 Complete data analyses will be done under missing completely at random  
46 assumptions. However, patterns in missing data will be explored and methods to  
47  
48  
49  
50  
51  
52  
53  
54  
55  
56  
57  
58  
59  
60

1  
2  
3  
4 evaluate potential impact of missing data on estimates will be used as appropriate such  
5 as multiple imputations using chained equations (MICE) accompanied by a sensitivity  
6 analysis to the missing data assumptions [62–64].  
7  
8

9  
10 Analyses will use STATA (StataCorp. 2017. Stata Statistical Software: Release 15.  
11 College Station, TX: StataCorp LLC) or R (R Core Team (2013)).  
12  
13

## 14 15 **Discussion**

16  
17 The prevalence of childhood asthma has increased in many LMICs over the past 50 or  
18 so years where asthma attacks are a growing burden to health systems [2]. There are  
19 limited data on determinants of asthma attacks in children and adolescents from LMIC  
20 settings [18], and a need for prospective studies to identify risk factors for asthma  
21 attacks so that the limited resources available in low-resource settings can be focused  
22 on those children most likely to suffer recurrent attacks to reduce morbidity and  
23 economic costs to health systems and patients' families. The Asthma ATTACK study  
24 aims to identify risk factors associated with asthma attacks among children and  
25 adolescents attending emergency rooms in public hospitals in three Ecuadorian cities.  
26  
27  
28  
29  
30  
31  
32  
33

34  
35 This study provides a range of climatic settings in Ecuador from high altitude (Cuenca  
36 and Quito) to sea level (Portoviejo). Study activities were interrupted in March 2020  
37 by the Covid-19 pandemic resulting in a suspension of recruitment in hospital ERs  
38 owing to dramatic changes in access to and use of health facilities. As a consequence,  
39 the study protocol was modified to allow re-initiation of recruitment and also the  
40 evaluation of the effect of exposures to SARS-CoV-2 on risk of asthma attacks and  
41 symptoms in children. The study will help fill an unmet knowledge gap on the effects  
42 of SARS-CoV-2 on pediatric asthma, particularly from low-resource LMIC settings [19].  
43  
44  
45  
46  
47  
48  
49  
50

## 51 **Ethics and dissemination**

52  
53 Ethical approval for Phase I was obtained from the Ethics Committee of the Hospital  
54 General Docente de Calderon (CEISH-HGDC 2019-001) and for Phase II from the  
55 Ecuadorian Ministry of Public Health COVID-19 Ethics Committee (MSP-CGDES-2021-  
56 0041-O N° 096-2021).  
57  
58  
59  
60

## References

1. Reddel HK, Busse WW, Pedersen S, Tan WC, Chen Y-Z, Jorup C, et al. Should recommendations about starting inhaled corticosteroid treatment for mild asthma be based on symptom frequency: a post-hoc efficacy analysis of the START study. *Lancet*. 2017;389: 157–166.
2. Pearce N, Ait-Khaled N, Beasley R, Mallol J, Keil U, Mitchell E, et al. Worldwide trends in the prevalence of asthma symptoms: phase III of the International Study of Asthma and Allergies in Childhood (ISAAC). *Thorax*. 2007;62: 758–766.
3. Hasegawa K, Bittner JC, Nonas SA, Stoll SJ, Watase T, Gabriel S, et al. Children and Adults With Frequent Hospitalizations for Asthma Exacerbation, 2012-2013: A Multicenter Observational Study. *J Allergy Clin Immunol Pract*. 2015;3: 751–8.e1.
4. Deschildre A, Pichavant M, Engelmann I, Langlois C, Drumez E, Pouessel G, et al. Virus-triggered exacerbation in allergic asthmatic children: neutrophilic airway inflammation and alteration of virus sensors characterize a subgroup of patients. *Respir Res*. 2017;18: 191.
5. Murray CS, Foden P, Sumner H, Shepley E, Custovic A, Simpson A. Preventing Severe Asthma Exacerbations in Children. A Randomized Trial of Mite-Impermeable Bedcovers. *Am J Respir Crit Care Med*. 2017;196: 150–158.
6. Taquechel K, Diwadkar AR, Sayed S, Dudley JW, Grundmeier RW, Kenyon CC, et al. Pediatric Asthma Health Care Utilization, Viral Testing, and Air Pollution Changes During the COVID-19 Pandemic. *J Allergy Clin Immunol Pract*. 2020;8: 3378–3387.e11.
7. Bønnelykke K, Sleiman P, Nielsen K, Kreiner-Møller E, Mercader JM, Belgrave D, et al. A genome-wide association study identifies CDHR3 as a susceptibility locus for early childhood asthma with severe exacerbations. *Nat Genet*. 2014;46: 51–55.
8. Fischer GB, Sarria EE, Camargos P, Mocelin HT, Soto-Quiroz M, Cruz AA, et al. Childhood asthma in low and middle-income countries: Where are we now? *Paediatr Respir Rev*. 2019;31: 52–57.
9. Carroll WD, Wildhaber J, Brand PLP. Parent misperception of control in childhood/adolescent asthma: the Room to Breathe survey. *Eur Respir J*. 2012;39: 90–96.
10. Vervloet M, van Dijk L, Spreeuwenberg P, Price D, Chisholm A, Van Ganse E, et al. The Relationship Between Real-World Inhaled Corticosteroid Adherence and Asthma Outcomes: A Multilevel Approach. *J Allergy Clin Immunol Pract*. 2020;8:

- 626–634.
11. Fleming L. Asthma exacerbation prediction: recent insights. *Curr Opin Allergy Clin Immunol*. 2018;18: 117–123.
  12. Nunes C, Pereira AM, Morais-Almeida M. Asthma costs and social impact. *Asthma Res Pract*. 2017;3: 1.
  13. Ardura-Garcia C, Arias E, Hurtado P, Bonnett LJ, Sandoval C, Maldonado A, et al. Predictors of severe asthma attack re-attendance in Ecuadorian children: a cohort study. *Eur Respir J*. 2019;54. doi:10.1183/13993003.02419-2018
  14. Smiley M, Sicignano N, Rush T, Lee R, Allen E. Outcomes of follow-up care after an emergency department visit among pediatric asthmatics in the military health system. *J Asthma*. 2016;53: 816–824.
  15. Beck AF, Simmons JM, Huang B, Kahn RS. Geomedicine: area-based socioeconomic measures for assessing risk of hospital reutilization among children admitted for asthma. *Am J Public Health*. 2012;102: 2308–2314.
  16. Zipkin R, Schragger SM, Nguyen E, Mamey MR, Banuelos I, Wu S. Association between pediatric home management plan of care compliance and asthma readmission. *J Asthma*. 2017;54: 761–767.
  17. Moncrief T, Beck AF, Simmons JM, Huang B, Kahn RS. Single parent households and increased child asthma morbidity. *J Asthma*. 2014;51: 260–266.
  18. Ardura-Garcia C, Stolbrink M, Zaidi S, Cooper PJ, Blakey JD. Predictors of repeated acute hospital attendance for asthma in children: A systematic review and meta-analysis. *Pediatr Pulmonol*. 2018;53: 1179–1192.
  19. Ochoa-Avilés AM, Ochoa-Avilés C, Morillo-Argudo DA, Molina-Cando MJ, Rodas-Espinoza CR, Chis Ster I, et al. Impact of COVID-19 pandemic on asthma symptoms and management: A prospective analysis of asthmatic children in Ecuador. *World Allergy Organ J*. 2021;14: 100551.
  20. McGeachie MJ, Yates KP, Zhou X, Guo F, Sternberg AL, Van Natta ML, et al. Patterns of Growth and Decline in Lung Function in Persistent Childhood Asthma. *N Engl J Med*. 2016;374: 1842–1852.
  21. Forno E, Gogna M, Cepeda A, Yañez A, Solé D, Cooper P, et al. Asthma in Latin America. *Thorax*. 2015;70: 898–905.
  22. Alith MB, Gazzotti MR, Nascimento OA, Jardim JR. Impact of asthma control on different age groups in five Latin American countries. *World Allergy Organ J*. 2020;13: 100113.
  23. Gold LS, Thompson P, Salvi S, Faruqi RA, Sullivan SD. Level of asthma control and

- 1  
2  
3  
4 health care utilization in Asia-Pacific countries. *Respir Med.* 2014;108: 271–277.  
5  
6  
7 24. Sastre J, Fabbri LM, Price D, Wahn HU, Bousquet J, Fish JE, et al. Insights,  
8 attitudes, and perceptions about asthma and its treatment: a multinational  
9 survey of patients from Europe and Canada. *World Allergy Organ J.* 2016;9: 13.  
10  
11 25. Reddel HK, Sawyer SM, Everett PW, Flood PV, Peters MJ. Asthma control in  
12 Australia: a cross-sectional web-based survey in a nationally representative  
13 population. *Medical Journal of Australia.* 2015. pp. 492–496.  
14 doi:10.5694/mja14.01564  
15  
16  
17 26. Ardura-Garcia C, Vaca M, Oviedo G, Sandoval C, Workman L, Schuyler AJ, et al.  
18 Risk factors for acute asthma in tropical America: a case-control study in the City  
19 of Esmeraldas, Ecuador. *Pediatric Allergy and Immunology.* 2015. pp. 423–430.  
20 doi:10.1111/pai.12401  
21  
22  
23 27. Cruz AA, Souza-Machado A, Franco R, Souza-Machado C, Ponte EV, Santos PM,  
24 et al. The Impact of a Program for Control of Asthma in a Low-Income Setting.  
25 *World Allergy Organization Journal.* 2010. pp. 167–174.  
26 doi:10.1097/wox.0b013e3181dc3383  
27  
28  
29 28. Cusack RP, Satia I, O’Byrne PM. Asthma maintenance and reliever therapy:  
30 Should this be the standard of care? *Ann Allergy Asthma Immunol.* 2020;125:  
31 150–155.  
32  
33  
34 29. Abrams EM, Becker AB, Szeffler SJ. Paradigm Shift in Asthma Therapy for  
35 Adolescents: Should It Apply to Younger Children as Well? *JAMA pediatrics.*  
36 2020. pp. 227–228.  
37  
38  
39 30. Abrams EM, Shaker M, Greenhawt M, Fernandes RM, Sinha I. Treatment of mild-  
40 to-moderate asthma in childhood and adolescence in 2021. *Lancet Respir Med.*  
41 2021;9: 443–445.  
42  
43 31. Reddel HK, FitzGerald JM, Bateman ED, Bacharier LB, Becker A, Brusselle G, et al.  
44 GINA 2019: a fundamental change in asthma management: Treatment of  
45 asthma with short-acting bronchodilators alone is no longer recommended for  
46 adults and adolescents. *Eur Respir J.* 2019;53. doi:10.1183/13993003.01046-  
47 2019  
48  
49  
50 32. Neffen H, Chahuàn M, Hernández DD, Vallejo-Perez E, Bolivar F, Sánchez MH, et  
51 al. Key factors associated with uncontrolled asthma – the Asthma Control in  
52 Latin America Study. *Journal of Asthma.* 2020. pp. 113–122.  
53 doi:10.1080/02770903.2018.1553050  
54  
55  
56 33. Liu S, Zhi Y, Ying S. COVID-19 and Asthma: Reflection During the Pandemic. *Clin*  
57 *Rev Allergy Immunol.* 2020;59: 78–88.  
58  
59  
60 34. Wang Y, Ao G, Qi X, Xie B. The association between COVID-19 and asthma: A

- 1  
2  
3  
4 systematic review and meta-analysis. *Clinical & Experimental Allergy*. 2020. pp.  
5 1274–1277. doi:10.1111/cea.13733  
6  
7  
8 35. Hartmann-Boyce J, Gunnell J, Drake J, Otunla A, Suklan J, Schofield E, et al.  
9 Asthma and COVID-19: review of evidence on risks and management  
10 considerations. *BMJ Evid Based Med*. 2020. doi:10.1136/bmjebm-2020-111506  
11  
12 36. Peters MC, Sajuthi S, Deford P, Christenson S, Rios CL, Montgomery MT, et al.  
13 COVID-19-related Genes in Sputum Cells in Asthma. Relationship to  
14 Demographic Features and Corticosteroids. *Am J Respir Crit Care Med*.  
15 2020;202: 83–90.  
16  
17  
18 37. Yamaya M, Nishimura H, Deng X, Sugawara M, Watanabe O, Nomura K, et al.  
19 Inhibitory effects of glycopyrronium, formoterol, and budesonide on coronavirus  
20 HCoV-229E replication and cytokine production by primary cultures of human  
21 nasal and tracheal epithelial cells. *Respir Investig*. 2020;58: 155–168.  
22  
23  
24 38. Schultze A, Douglas I. COVID-19 and inhaled corticosteroids—another piece in  
25 an expanding puzzle. *The Lancet Respiratory Medicine*. 2021. pp. 674–675.  
26 doi:10.1016/s2213-2600(21)00076-x  
27  
28  
29 39. Papadopoulos NG, Mathioudakis AG, Custovic A, Deschildre A, Phipatanakul W,  
30 Wong G, et al. Childhood asthma outcomes during the COVID-19 pandemic:  
31 Findings from the PeARL multi-national cohort. *Allergy*. 2021;76: 1765–1775.  
32  
33  
34 40. Kaye L, Theye B, Smeenk I, Gondalia R, Barrett MA, Stempel DA. Changes in  
35 medication adherence among patients with asthma and COPD during the  
36 COVID-19 pandemic. *J Allergy Clin Immunol Pract*. 2020;8: 2384–2385.  
37  
38  
39 41. Instituto Nacional de Meteorología e Hidrología. Anuario Meteorológico Nro. 53-  
40 2013. Quito, Ecuador: INAMHI; 2015.  
41  
42 42. Ministerio de Salud Pública. Manual del modelo de atención integral del sistema  
43 nacional de salud familiar comunitario e intercultural (MAIS-FCI). Ecuador: MAIS-  
44 FCI; 2012 [cited 22 Apr 2021]. Available:  
45 <https://es.scribd.com/document/338645477/Manual-MAIS-MSP12-12-12-pdf>  
46  
47 43. Lucio R, Villacrés N, Henríquez R. Sistema de salud de Ecuador. *Salud pública de*  
48 *México*. 2011;53: s177–s187.  
49  
50  
51 44. Liu AH, Zeiger R, Sorkness C, Mahr T, Ostrom N, Burgess S, et al. Development  
52 and cross-sectional validation of the Childhood Asthma Control Test. *J Allergy*  
53 *Clin Immunol*. 2007;119: 817–825.  
54  
55  
56 45. Nathan RA, Sorkness CA, Kosinski M, Schatz M, Li JT, Marcus P, et al.  
57 Development of the asthma control test☆A survey for assessing asthma control.  
58 *Journal of Allergy and Clinical Immunology*. 2004. pp. 59–65.  
59 doi:10.1016/j.jaci.2003.09.008  
60

- 1
- 2
- 3
- 4
- 5 46. Juniper EF, Guyatt GH, Feeny DH, Ferrie PJ, Griffith LE, Townsend M. Measuring
- 6 quality of life in children with asthma. *Qual Life Res.* 1996;5: 35–46.
- 7
- 8 47. Fitzclarence CA, Henry RL. Validation of an asthma knowledge questionnaire. *J*
- 9 *Paediatr Child Health.* 1990;26: 200–204.
- 10
- 11 48. Praena Crespo M, Lora Espinosa A, Aquino Llinares N, Sánchez Sánchez AM,
- 12 Jiménez Cortés A. [The Spanish version of the Newcastle Asthma Knowledge
- 13 Questionnaire for parents of children with asthma (NAKQ). Transcultural
- 14 adaptation and reliability analysis]. *An Pediatr.* 2009;70: 209–217.
- 15
- 16 49. Franco R, Nascimento HF, Cruz AA, Santos AC, Souza-Machado C, Ponte EV, et al.
- 17 The economic impact of severe asthma to low-income families. *Allergy.* 2009;64:
- 18 478–483.
- 19
- 20 50. Quanjer PH, Stanojevic S, Cole TJ, Baur X, Hall GL, Culver BH, et al. Multi-ethnic
- 21 reference values for spirometry for the 3-95-yr age range: the global lung
- 22 function 2012 equations. *Eur Respir J.* 2012;40: 1324–1343.
- 23
- 24 51. Association for Respiratory Technology & Physiology. ARTP COVID-19 GROUP:
- 25 Practical guidance for increasing Lung Function and Sleep activity during COVID-
- 26 19 Endemic Phase. Aug 2020 [cited 25 Jan 2021]. Available:
- 27 [https://www.artp.org.uk/write/MediaUploads/Standards/COVID19/ARTP\\_COVI](https://www.artp.org.uk/write/MediaUploads/Standards/COVID19/ARTP_COVID_Practical_Innovations_Vers1.2_final.pdf)
- 28 [D\\_Practical\\_Innovations\\_Vers1.2\\_final.pdf](https://www.artp.org.uk/write/MediaUploads/Standards/COVID19/ARTP_COVID_Practical_Innovations_Vers1.2_final.pdf)
- 29
- 30 52. PCRS. Position Statement Diagnostic work up of the patient presenting with
- 31 respiratory symptoms during the COVID-19 pandemic. In: The Primary Care
- 32 Respiratory Society [Internet]. 17 Sep 2020 [cited 25 Jan 2021]. Available:
- 33 [https://www.pcrs-uk.org/sites/pcrs-uk.org/files/resources/COVID19/Diagnosis-](https://www.pcrs-uk.org/sites/pcrs-uk.org/files/resources/COVID19/Diagnosis-asthma-COPD-during-Covid-19-v2-17-September-2020.pdf)
- 34 [asthma-COPD-during-Covid-19-v2-17-September-2020.pdf](https://www.pcrs-uk.org/sites/pcrs-uk.org/files/resources/COVID19/Diagnosis-asthma-COPD-during-Covid-19-v2-17-September-2020.pdf)
- 35
- 36 53. Coronavirus & the 2nd Generation NObreath - Update. In: NObreath [Internet].
- 37 [cited 25 Jan 2021]. Available: [https://www.nobreathfeno.com/coronavirus-and-](https://www.nobreathfeno.com/coronavirus-and-the-2nd-generation-nobreath-update/)
- 38 [the-2nd-generation-nobreath-update/](https://www.nobreathfeno.com/coronavirus-and-the-2nd-generation-nobreath-update/)
- 39
- 40 54. Guevara Á, Vivero S, Nipaz V, Guaraca V, Coloma J. A Low-Cost SARS-CoV-2 rRBD
- 41 ELISA to Detect Serostatus in Ecuadorian Population with COVID-19. *Am J Trop*
- 42 *Med Hyg.* 2021. doi:10.4269/ajtmh.20-1420
- 43
- 44 55. AAAAI. Spirometry during COVID-19. In: American Academy of Allergy, Asthma &
- 45 Immunology [Internet]. 23 Apr 2020 [cited 25 Jan 2021]. Available:
- 46 <https://www.aaaai.org/ask-the-expert/spirometry>
- 47
- 48 56. Stanojevic S, Beaucage F, Comondore V, Faughnan M, Kovesi T, McCoy C, et al.
- 49 Resumption of pulmonary function testing during the post-peak phase of the
- 50 COVID-19 pandemic. *Canadian Journal of Respiratory, Critical Care, and Sleep*
- 51 *Medicine.* 2020. pp. 156–159. doi:10.1080/24745332.2020.1796211
- 52
- 53
- 54
- 55
- 56
- 57
- 58
- 59
- 60



- 1
- 2
- 3
- 4 57. McGowan A, Sylvester K, Burgos F, Boros P, de Jongh F, Kendrick A, et al.
- 5 Recommendation from ERS Group 9.1 (Respiratory function
- 6 technologists/Scientists) Lung function testing during COVID-19 pandemic and
- 7 beyond. ; 2020 [accessed 2020 Aug 31]. In: European Respiratory Society
- 8 [Internet]. [cited 18 Jul 2020]. Available:
- 9 <https://ers.app.box.com/s/zs1uu88wy51monr0ewd990itoz4tsn2h>
- 10
- 11
- 12 58. Vittinghoff E, McCulloch CE. Relaxing the rule of ten events per variable in
- 13 logistic and Cox regression. *Am J Epidemiol.* 2007;165: 710–718.
- 14
- 15 59. Peduzzi P, Concato J, Kemper E, Holford TR, Feinstein AR. A simulation study of
- 16 the number of events per variable in logistic regression analysis. *J Clin Epidemiol.*
- 17 1996;49: 1373–1379.
- 18
- 19 60. Concato J, Peduzzi P, Holford TR, Feinstein AR. Importance of events per
- 20 independent variable in proportional hazards analysis. I. Background, goals, and
- 21 general strategy. *J Clin Epidemiol.* 1995;48: 1495–1501.
- 22
- 23 61. Peduzzi P, Concato J, Feinstein AR, Holford TR. Importance of events per
- 24 independent variable in proportional hazards regression analysis. II. Accuracy
- 25 and precision of regression estimates. *J Clin Epidemiol.* 1995;48: 1503–1510.
- 26
- 27 62. White IR, Royston P, Wood AM. Multiple imputation using chained equations:
- 28 Issues and guidance for practice. *Stat Med.* 2011;30: 377–399.
- 29
- 30 63. White IR, Royston P. Imputing missing covariate values for the Cox model. *Stat*
- 31 *Med.* 2009;28: 1982–1998.
- 32
- 33 64. Royston P, Altman DG. External validation of a Cox prognostic model: principles
- 34 and methods. *BMC Med Res Methodol.* 2013;13: 33.
- 35
- 36
- 37
- 38
- 39
- 40
- 41
- 42
- 43
- 44

45 **Author statement:** Study design – PJC, AAC, NR, MB, MP, CA-G; study conduct – DM,

46 SM-B, AO, MEC, CR, AM, KA, AR, CF; manuscript drafting – PJC, DM, SM-B; statistical

47 analysis plan – ICS; manuscript editing and review – all authors.

48

49

50

51 **Funding:** This work is based on the Asthma Attacks Causes and Prevention Study in

52 Urban Latin America which is funded by the National Institute of Health Research

53 [NIHR] under the Global Health Research Programme [grant 17/63/62]. Additional

54

55

56

57

58

59

60

1  
2  
3  
4 financial support was provided by the Corporación Ecuatoriana para el Desarrollo de  
5 la Investigación y la Academia CEDIA [N° CEPRA-XV-2021-03].  
6  
7  
8  
9

10 **Competing Interests statement:** The authors declare no competing interests.  
11  
12

13 **Patient and public involvement statement:** There was no patient or public  
14 involvement in the design or conduct of this study. Results of tests are being provided  
15 at the time of testing and the study population is being informed of study results  
16 through periodic leaflets, a website, social media texts and videos, and study group  
17 online meetings.  
18  
19  
20  
21  
22  
23  
24  
25  
26  
27  
28  
29  
30  
31  
32  
33  
34  
35  
36  
37  
38  
39  
40  
41  
42  
43  
44  
45  
46  
47  
48  
49  
50  
51  
52  
53  
54  
55  
56  
57  
58  
59  
60

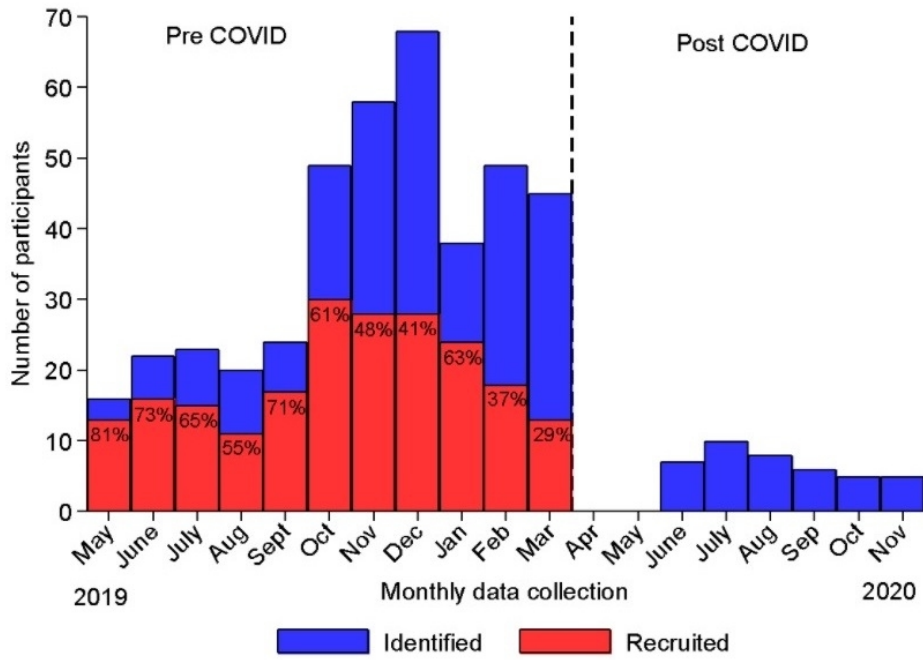

Figure 1

152x107mm (144 x 144 DPI)

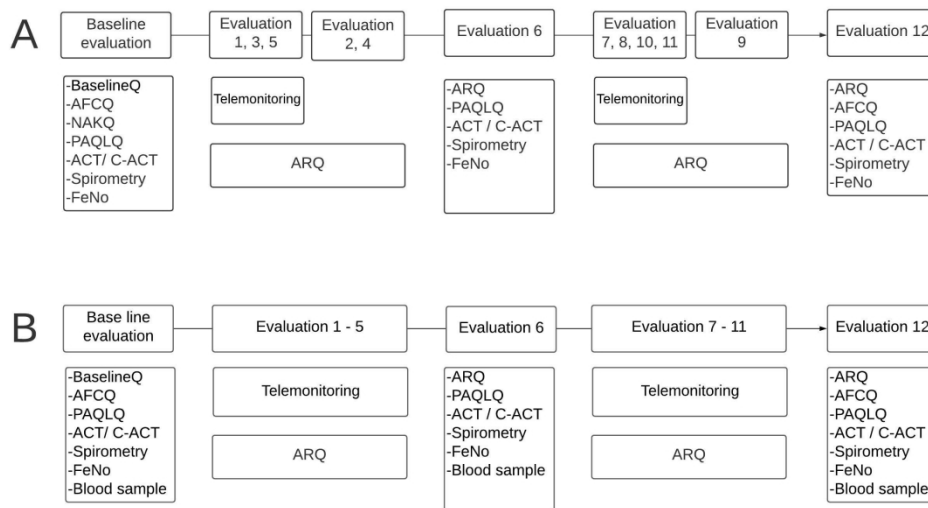

Figure 2

408x217mm (160 x 160 DPI)

# BMJ Open

## A prospective study of factors associated with asthma attack recurrence (ATTACK) in children from three Ecuadorian cities during COVID-19: a study protocol

|                                 |                                                                                                                                                                                                                                                                                                                                                                                                                                                                                                                                                                                                                                                                                                                                                                                                                                                                                                                                                                                                                                                                                                                                                                                                                                                                |
|---------------------------------|----------------------------------------------------------------------------------------------------------------------------------------------------------------------------------------------------------------------------------------------------------------------------------------------------------------------------------------------------------------------------------------------------------------------------------------------------------------------------------------------------------------------------------------------------------------------------------------------------------------------------------------------------------------------------------------------------------------------------------------------------------------------------------------------------------------------------------------------------------------------------------------------------------------------------------------------------------------------------------------------------------------------------------------------------------------------------------------------------------------------------------------------------------------------------------------------------------------------------------------------------------------|
| Journal:                        | <i>BMJ Open</i>                                                                                                                                                                                                                                                                                                                                                                                                                                                                                                                                                                                                                                                                                                                                                                                                                                                                                                                                                                                                                                                                                                                                                                                                                                                |
| Manuscript ID                   | bmjopen-2021-056295.R1                                                                                                                                                                                                                                                                                                                                                                                                                                                                                                                                                                                                                                                                                                                                                                                                                                                                                                                                                                                                                                                                                                                                                                                                                                         |
| Article Type:                   | Protocol                                                                                                                                                                                                                                                                                                                                                                                                                                                                                                                                                                                                                                                                                                                                                                                                                                                                                                                                                                                                                                                                                                                                                                                                                                                       |
| Date Submitted by the Author:   | 28-Apr-2022                                                                                                                                                                                                                                                                                                                                                                                                                                                                                                                                                                                                                                                                                                                                                                                                                                                                                                                                                                                                                                                                                                                                                                                                                                                    |
| Complete List of Authors:       | Morillo, Diana; Universidad Internacional del Ecuador<br>Mena-Bucheli, Santiago; Universidad Internacional del Ecuador<br>Ochoa, Angélica; Universidad de Cuenca<br>Chico, Martha E; Universidad Internacional del Ecuador<br>Rodas, Claudia; Universidad de Azuay<br>Maldonado, Augusto; Universidad San Francisco de Quito; Hospital General Docente Calderón<br>Arteaga, Karen; Hospital Verdi Cevallos Balda<br>Alchundia, Jessica; Hospital de Especialidades Portoviejo<br>Solorzano, Karla; Hospital de Especialidades Portoviejo<br>Rodriguez, Alejandro ; Universidad Internacional del Ecuador<br>Figueiredo, Camila; Universidade Federal da Bahia<br>Ardura-Garcia, Cristina; University of Bern<br>Bachmann, Max; Univeristy of East Anglia, Norwich Medical School, University of East Anglia<br>Perkin, Michael; St George's, Population Health Research Institute<br>Chis Ster, Irina; St. George's University of London; St George's University of London<br>Cruz, Alvaro; Universidade Federal da Bahia<br>Romero, Natalia; Universidad Internacional del Ecuador, Quito, School of Medicine; Grups de Recerca d'America i Africa Llatines, GRAAL<br>Cooper, Philip; Universidad Internacional del Ecuador; St George's University of London |
| <b>Primary Subject Heading</b>: | Respiratory medicine                                                                                                                                                                                                                                                                                                                                                                                                                                                                                                                                                                                                                                                                                                                                                                                                                                                                                                                                                                                                                                                                                                                                                                                                                                           |
| Secondary Subject Heading:      | Global health, Epidemiology, Public health                                                                                                                                                                                                                                                                                                                                                                                                                                                                                                                                                                                                                                                                                                                                                                                                                                                                                                                                                                                                                                                                                                                                                                                                                     |
| Keywords:                       | Asthma < THORACIC MEDICINE, COVID-19, Epidemiology < THORACIC MEDICINE                                                                                                                                                                                                                                                                                                                                                                                                                                                                                                                                                                                                                                                                                                                                                                                                                                                                                                                                                                                                                                                                                                                                                                                         |
|                                 |                                                                                                                                                                                                                                                                                                                                                                                                                                                                                                                                                                                                                                                                                                                                                                                                                                                                                                                                                                                                                                                                                                                                                                                                                                                                |

SCHOLARONE™  
Manuscripts

**Title:** A prospective study of factors associated with asthma attack recurrence (ATTACK) in children from three Ecuadorian cities during COVID-19: a study protocol

### Authors

Diana Morillo<sup>1</sup>, Santiago Mena-Bucheli<sup>1</sup>, Angélica Ochoa<sup>2</sup>, Martha E Chico<sup>1</sup>, Claudia Rodas<sup>3</sup>, Augusto Maldonado<sup>4,5</sup>, Karen Arteaga<sup>6</sup>, Jessica Alchundia<sup>7</sup>, Karla Solorzano<sup>7</sup>, Alejandro Rodriguez<sup>1</sup>, Camila Figueiredo<sup>8</sup>, Cristina Ardura-Garcia<sup>9</sup>, Max Bachmann<sup>10</sup>, Michael Perkin<sup>11</sup>, Irina Chis Ster<sup>11</sup>, Alvaro A Cruz<sup>8, 12</sup>, \*Natalia Romero<sup>1,13</sup>, \*Philip J Cooper<sup>1,11</sup>

### Affiliations

<sup>1</sup> Universidad Internacional del Ecuador, Quito, Ecuador.

<sup>2</sup> Universidad de Cuenca, Cuenca, Ecuador.

<sup>3</sup> Universidad de Azuay, Cuenca, Ecuador

<sup>4</sup> Universidad San Francisco de Quito, Quito, Ecuador

<sup>5</sup> Hospital General Docente Calderón, Quito, Ecuador

<sup>6</sup> Hospital Verdi Cevallos Balda, Portoviejo, Ecuador

<sup>7</sup> Hospital de Especialidades, Portoviejo, Ecuador

<sup>8</sup> Universidade Federal da Bahia, Salvador, Brazil

<sup>9</sup> Institute of Social and Preventive Medicine, University of Bern, Bern, Switzerland.

<sup>10</sup> University of East Anglia, Norwich, UK.

<sup>11</sup> St George's University of London, London, UK.

<sup>12</sup> ProAR-Center of Excellence in Asthma, Salvador, Brazil

<sup>13</sup> Grups de Recerca d'Amèrica i Àfrica Llatines GRAAL, Barcelona, Spain

\*Contributed equally

### Correspondence

Philip J. Cooper, Escuela de Medicina, Universidad Internacional del Ecuador, Av. Jorge Fernández y Av. Simon Bolivar, Quito, Ecuador.

Email: [pcooper@sgul.ac.uk](mailto:pcooper@sgul.ac.uk)

**Word count**  
Abstract: 299  
Text: 4,372

1  
2  
3  
4  
5  
6  
7  
8  
9  
10  
11  
12  
13  
14  
15  
16  
17  
18  
19  
20  
21  
22  
23  
24  
25  
26  
27  
28  
29  
30  
31  
32  
33  
34  
35  
36  
37  
38  
39  
40  
41  
42  
43  
44  
45  
46  
47  
48  
49  
50  
51  
52  
53  
54  
55  
56  
57  
58  
59  
60

### Strengths and limitations of this study

- Asthma attacks are a growing cause of morbidity in children and burden on health systems in low and middle-income countries, and there is limited information on factors associated with asthma attacks in poor urban settings in Latin America.
- This protocol describes a study designed to investigate risk factors associated with recurrence of asthma attacks in children and adolescents living in marginalized settings in three Ecuadorian cities.
- This study is recruiting children and adolescents with uncontrolled asthma symptoms and asthma attacks and following them prospectively for 6 to 12 months to identify factors associated with recurrence of attacks in the context of the COVID-19 pandemic.
- The COVID-19 pandemic has had a major impact on health seeking behaviours while mitigation strategies to control transmission of the novel coronavirus, SARS-CoV-2, have resulted in marked declines in the circulation of respiratory viruses that are considered to underlie a high proportion of asthma attacks. Such factors may interfere with recruitment and follow-up of study participants.



## Abstract

**Introduction:** Asthma is a growing health problem in children in marginalized urban settings in low and middle-income countries. Asthma attacks are an important cause of emergency care attendance and long-term morbidity. We designed a prospective study, the Asthma Attacks study (ATTACK), to identify factors associated with recurrence of asthma attacks (or exacerbations) among children and adolescents attending emergency care in three Ecuadorian cities.

**Methods and analysis:** Prospective cohort study designed to identify risk factors associated with recurrence of asthma attacks in 450 children and adolescents aged 5 to 17 years attending emergency care in public hospitals in three Ecuadorian cities (Quito, Cuenca, and Portoviejo). The primary outcome will be rate of asthma attack recurrence during up to 12 months of follow-up. Data are being collected at baseline and during follow-up by questionnaire: sociodemographic data, asthma history and management (baseline only); recurrence of asthma symptoms and attacks (monthly); economic costs of asthma to family; Asthma Control Test; Pediatric Asthma Quality of life Questionnaire; and Newcastle Asthma Knowledge Questionnaire (baseline only). In addition, the following are being measured at baseline and during follow-up: lung function and reversibility by spirometry before and after salbutamol; fractional exhaled nitric oxide (FeNO); and presence of IgG antibodies to SARS-CoV-2 in blood. Recruitment started in 2019 but because of severe disruption to emergency services caused by the COVID-19 pandemic, eligibility criteria were modified to include asthmatic children with uncontrolled symptoms and registered with collaborating hospitals. Data will be analysed using logistic regression and survival analyses.

**Ethics and dissemination:** Ethical approval was obtained from the Hospital General Docente de Calderon (CEISH-HGDC 2019-001) and Ecuadorian Ministry of Public Health (MSP-CGDES-2021-0041-O N° 096-2021). The study results will be disseminated through presentations at conferences and to key stakeholder groups including policy makers, postgraduate theses, peer-review publications, and a study website.

## Introduction

Asthma is the most common chronic disease of childhood and is estimated to affect more than 350 million people worldwide [1]. Although initially described as a disease of high-income countries (HICs) such as the United Kingdom, international comparisons using standardized methodologies have shown a similar or greater prevalence among children in urban centres in Latin America as observed in HICs [2]. There is evidence that the prevalence of asthma has increased in low- and middle-income countries (LMICs) over recent decades [2].

Asthma attacks or exacerbations are frequent in children and are a common cause of hospitalization [3], most frequently associated with respiratory viral infections [4], but also with exposures to allergens [5] and air pollution [6] among individuals with an underlying genetic susceptibility [7]. Asthma is an underdiagnosed disease because of lack of specialized personnel and resources to evaluate lung function. Further, limited access to specialized care and treatment [8], accompanied by poor treatment adherence [9,10] are important contributing factors to inadequate disease control and attacks, especially in underprivileged populations. In such settings, asthma patients with poor control of their daily symptoms often rely on emergency room care for management of their symptoms [11], resulting in high economic costs to health systems and patients' families [8,12].

To understand better factors contributing to the risk of asthma attacks, it is important identify those factors contributing to suboptimal management which can be improved through better health care [13]. Several studies have investigated potential predictors of recurrence of asthma attacks among children attending emergency services. Factors identified as important included a history of previous emergency attendances for acute asthma attacks, younger age [13–15], ethnicity of African descent [16,17], and low socioeconomic status [13,18]. These studies were conducted almost exclusively in North America and frequently included adult Hispanic populations living there. There are relatively few such studies done in LMICs [13,16,18].

1  
2  
3  
4 The Asthma Attacks Study (ATTACK) aims to identify factors related to recurrence of  
5 asthma attacks in Ecuadorian children attending emergency care in three Ecuadorian  
6 cities. Recruitment into the study started in March 2019 but was interrupted by the  
7 COVID-19 pandemic that had a major impact on use of and access to emergency care  
8 [19]. In consequence, the original protocol was modified to allow continued  
9 recruitment and measure the impact of the COVID-19 pandemic and exposures to  
10 SARS-CoV-2 on asthma attacks in children and adolescents.  
11  
12  
13  
14  
15  
16  
17  
18

19 *What is known about factors related to asthma attacks and impact of COVID-19*  
20 *pandemic?*  
21

22 Severe asthma in children is associated with loss of lung function [20], as well as with  
23 high costs of medical and family care [2]. In Latin America, asthma has been described  
24 as a major public health problem because of a high prevalence and significant  
25 associated morbidity and mortality [21]. Asthma control among children in Latin  
26 America has been reported to be among the worse worldwide [22–25]. The Latin  
27 America Asthma Insights and Management study reported adequate asthma control  
28 in less than 20% of asthmatic children in Argentina, Brazil, Mexico, Venezuela, and  
29 Puerto Rico [22]. A case-control study of asthmatic children with an acute attack  
30 attending an Emergency Room (ER) in coastal Ecuador showed that, over the previous  
31 12 months, only 20% of children had visited a doctor in the past year for a routine visit,  
32 86% had attended an emergency room at least once prior, and none were receiving  
33 inhaled corticosteroids despite over half having suffered four or more acute  
34 exacerbations [26]. A previous prospective study of children with asthma attacks in  
35 coastal Ecuador showed a recurrence rate of 46% within 6 months [13].  
36  
37  
38  
39  
40  
41  
42  
43  
44  
45  
46  
47  
48  
49

50 Asthma attacks represent an acute or subacute increase in respiratory symptoms [25]  
51 and severe attacks - defined as requiring ER or hospital care and treatment with  
52 systemic corticosteroids for at least 3 days - are associated with loss of lung function  
53 [20] and high economic costs to the patient's family and health care system [7], as well  
54 as absenteeism in work and school.  
55  
56  
57  
58  
59  
60

1  
2  
3  
4 Asthma attacks may be prevented either by avoiding previously identified triggers or  
5  
6 by appropriate preventive treatment. Patients using inhaled corticosteroids (ICS) were  
7  
8 3 times more likely to have well-controlled asthma [22], a reduction in symptoms  
9  
10 independent of frequency, and better lung function [1]. In Brazil, preventive strategies  
11  
12 have been successfully implemented through asthma control programs such as Pro-AR  
13  
14 in Salvador de Bahía to reduce future risk in asthmatic patients from less privileged  
15  
16 backgrounds, through the provision of ICS [27]. There has been a shift to using ICS more  
17  
18 widely for control of asthma, for example, through the provision of combination  
19  
20 inhalers including both ICS and a beta<sub>2</sub> agonist for moderate to severe asthma [28].  
21  
22 More recent evidence indicate that the use of ICS may be beneficial even for asthmatic  
23  
24 children with mild disease that accounts for 30-40% of severe attacks [29]. Treatment  
25  
26 recommendations for children and adolescents with mild disease are now shifting to  
27  
28 use of ICS (plus long-acting beta-agonists in combination inhalers) as required [30,31].  
29  
30 Despite such initiatives, access to ICS in many LMIC settings is limited within health  
31  
32 care systems because of cost and a failure to recognize the public health impact of  
33  
34 childhood asthma. In such settings, children with asthma symptoms frequently over-  
35  
36 rely on ER care for the acute control of their symptoms in the absence of adequate  
37  
38 provision of specialized care for their long-term management [26,32].

39  
40 Soon after the emergence of the novel coronavirus, SARS-CoV-2, in humans and its  
41  
42 spread into a global pandemic, the question was raised as to whether this novel viral  
43  
44 infection might alter the risk of asthma symptoms because of deficient antiviral  
45  
46 immune responses and the tendency to increase exacerbations during infections with  
47  
48 other respiratory viruses [33]. To date, evidence from studies of asthmatic children and  
49  
50 adults do not indicate an increased risk [34,35]. Characteristics of asthmatic airways  
51  
52 among those with T2-linked phenotypes may reduce the expression of the cellular  
53  
54 receptor for SARS-CoV-2, angiotensin-converting enzyme 2 (ACE2), in the airways [36].  
55  
56 It has been suggested that the use of ICS among asthmatics may reduce risk of severe  
57  
58 COVID-19 by suppressing inflammation and enhancing antiviral defenses [37],  
59  
60 although the evidence remains unclear [38]. There are limited data from pediatric  
populations [38]. The COVID-19 pandemic has resulted in marked reductions in

1  
2  
3  
4 hospital visits including to emergency rooms (Figure 1), reduced attack rates, and  
5 better lung function among children with asthma [19,39], which are likely  
6 consequences of mitigation measures to reduce transmission of SARS-CoV-2 (such as  
7 lockdowns, face masks, and social distancing) that have resulted also in the reduced  
8 transmission of other respiratory viruses [4,6,10,39]. Treatment adherence may have  
9 improved also because of better parental supervision of asthma medications [40].  
10 There are limited data on the impact of exposure to SARS-CoV-2 on asthma attacks and  
11 uncontrolled symptoms and the impact of the collateral effects of the COVID-19  
12 pandemic including reduced access to health services and medications and effects of  
13 COVID-19 mitigation efforts in resource-poor LMIC settings.  
14  
15  
16  
17  
18  
19  
20  
21  
22  
23

24 **Figure 1: Impact of the COVID-19 pandemic in the 3 study centres in Quito, Portoviejo**  
25 **and Cuenca, Ecuador, on recruitment rates into the study and number of potentially**  
26 **eligible subjects identified in collaborating emergency rooms. Red bars show**  
27 **numbers recruited as a proportion (%) of those eligible (blue bars) prior to a legally**  
28 **enforced national lockdown on 16<sup>th</sup> March 2020.**  
29  
30  
31  
32  
33

## 34 **Methods and analysis**

### 35 *The Asthma Attack study*

36  
37 A prospective multi-center study is being done in children aged 5 to 17 years in low-  
38 income settings in three Ecuadorian cities (Quito, Cuenca, and Portoviejo) to study  
39 factors associated with acute asthma attacks. Because of the impact of the COVID-19  
40 pandemic on risk of asthma attacks and health care access, the study was divided into  
41 2 phases of recruitment and follow-up: 1) Phase I (or pre-COVID-19 from May 2019 to  
42 March 2020) evaluated risk factors associated with recurrence of acute asthma attacks  
43 among children and adolescents attending emergency rooms of public hospitals in low-  
44 income settings in the three cities; and 2) Phase II (or peri-COVID-19 from March 2021  
45 to June 2022) is evaluating risk factors associated with attacks among children and  
46 adolescents with asthma and current symptoms who have previously attended  
47 specialist care at public hospitals in Cuenca and Portoviejo. Phase II is also evaluating  
48 the effects of exposures to SARS-CoV-2 on asthma attacks and symptoms. In addition,  
49  
50  
51  
52  
53  
54  
55  
56  
57  
58  
59  
60

1  
2  
3  
4 both study phases are evaluating the impact of asthma symptoms and adequate  
5 control of asthma on the quality of life and economic costs for the family of children  
6 and adolescents with asthma. The objectives of Phases I and II are detailed in Table 1.  
7  
8 Qualitative studies of health worker's perspectives on asthma care coordination  
9 between primary and specialized health care are being done also as described  
10 elsewhere [41].  
11  
12  
13  
14  
15  
16

### 17 *Study design and setting*

18 This is a multi-center prospective study conducted in three Ecuadorian cities (Quito,  
19 Cuenca, and Portoviejo). Quito, the capital, and Cuenca, the third largest city, are  
20 located in the Andean highlands (altitude >2,500m) where the annual average  
21 temperature is ~16°C, while Portoviejo is in the coastal region (at sea level) with an  
22 annual average temperature of ~25 °C [42]. According to the 2010 census, the  
23 populations of the three cities are: Quito >2 million, Cuenca 0.5 million, and Portoviejo  
24 0.28 million inhabitants. Ecuador is an upper-middle-income-country with a per capita  
25 income of \$6,080 in 2019. The health system in Ecuador includes public and private  
26 provision. Public institutions offer universal health coverage that is stratified into  
27 different levels of care from primary to tertiary services [43]. Social security institutions  
28 offer health services to affiliated salaried workers and their families. The private sector  
29 includes for-profit entities (hospitals, clinics, dispensaries, doctor's offices, pharmacies,  
30 and prepaid health insurance companies) which are generally located in the main cities  
31 [44].  
32  
33  
34  
35  
36  
37  
38  
39  
40  
41  
42  
43  
44  
45

### 46 *Study centers*

47 The study was initially based in the tertiary care hospitals in each of the three cities  
48 (Hospital Docente General de Calderon, Quito; Hospital Vicente Corral Moscoso,  
49 Cuenca; and Hospital Verdi Cevallos Balda, Portoviejo).  
50  
51  
52  
53  
54  
55  
56  
57  
58  
59  
60

| PHASE    | OBJECTIVES                                                                                                        | HOW OBJECTIVE WILL BE ACHIEVED                                                                                                                             | STATISTICAL OUTCOME                                                                       | STATISTICAL METHODS                                               | STATISTICAL INFERENCE                                                                                                                                                                                                     |
|----------|-------------------------------------------------------------------------------------------------------------------|------------------------------------------------------------------------------------------------------------------------------------------------------------|-------------------------------------------------------------------------------------------|-------------------------------------------------------------------|---------------------------------------------------------------------------------------------------------------------------------------------------------------------------------------------------------------------------|
| <b>1</b> | <b>PRIMARY:</b>                                                                                                   |                                                                                                                                                            |                                                                                           |                                                                   |                                                                                                                                                                                                                           |
|          | Risk factors associated with asthma attacks recurrence requiring an emergency visit during follow-up              | Monthly follow-up and recording of events                                                                                                                  | Binary: Yes/No indicating at least one individual recurrence                              | Logistic regression                                               | OR and 95% CIs; Predictive model for recurrence, ROC and AUC                                                                                                                                                              |
|          | <b>SECONDARY:</b>                                                                                                 |                                                                                                                                                            |                                                                                           |                                                                   |                                                                                                                                                                                                                           |
|          | 1. Risk factors associated with time to first asthma attack recurrence                                            | Monthly follow-up and recording of events                                                                                                                  | Binary: Yes/No indicating the first recurrence and/or time to the first event             | Survival analyses modelling time to first event                   | HR and 95% CIs; Survival models – proportional hazard (semi-parametric Cox or parametric Weibull) or accelerated time failure depending on data                                                                           |
|          | 2. Risk factors associated with monthly asthma attack recurrence                                                  | Monthly follow-up and recording of events                                                                                                                  | Longitudinal binary outcomes indicating events and times                                  | Longitudinal binary outcome                                       | OR; HR and 95 %CIs; Longitudinal binary models (GEE)                                                                                                                                                                      |
|          | 3. Evaluate impact of asthma recurrence and control on quality of life and economic costs for patient’s families. | Monthly follow-up and recording of events and questionnaire on asthma control (0, 6, & 12 months) and quality of life and economic costs at 6 & 12 months. | Longitudinal continuous outcomes indicating scores for quality of life and economic costs | Longitudinal continuous data outcomes and time-varying covariates | Multiple events per individual - frailty survival analysis<br>Longitudinal continuous data analysis with time varying binary covariates indicating presence of recurrent event                                            |
| <b>2</b> | <b>PRIMARY:</b>                                                                                                   |                                                                                                                                                            |                                                                                           |                                                                   |                                                                                                                                                                                                                           |
|          | Risk factors associated with asthma attacks recurrence requiring an emergency visit during follow-up              | Monthly follow-up and recording of events                                                                                                                  | Binary: Yes/No indicating at least one individual recurrence during follow-up             | Logistic regression                                               | OR and 95% CIs; Predictive model, ROC, AUC                                                                                                                                                                                |
|          | <b>SECONDARY:</b>                                                                                                 |                                                                                                                                                            |                                                                                           |                                                                   |                                                                                                                                                                                                                           |
|          | 1. Risk factors associated with time to first asthma attack recurrence                                            | Monthly follow-up and recording of events                                                                                                                  | Binary: Yes/No indicating the first recurrence and/or time to first event                 | Survival type analyses modelling time to first event              | HR and 95% CIs; Survival models – proportional hazard (semi-parametric Cox or parametric Weibull) or accelerated time failure depending on data                                                                           |
|          | 2. Risk factors associated with monthly asthma attack recurrence                                                  | Monthly follow-up and recording of events                                                                                                                  | Longitudinal binary outcomes indicating events and times                                  | Longitudinal binary outcome                                       | OR; HR and 95% CIs; Longitudinal binary models (GEE estimation)                                                                                                                                                           |
|          | 3. Evaluate impact of asthma recurrence and control on quality of life and economic costs for patient’s families. | Monthly follow-up and recording of events and questionnaire on asthma control (0, 6, & 12 months) and quality of life and economic costs at 6 & 12 months. | Longitudinal continuous outcomes indicating scores for quality of life and economic costs | Longitudinal continuous outcomes and time-varying covariates      | Multiple events per individual - frailty survival analysis<br>OR and 95% CIs; Longitudinal continuous data analysis with time varying binary covariates indicating presence of recurrent event                            |
|          | 4. Effects of seropositivity to SARS-CoV-2 on risk of any asthma attack recurrence and number of events           | Serology for SARS-CoV-2 at 0 & 6 months                                                                                                                    | Longitudinal binary outcomes indicating events and times                                  | Longitudinal binary outcome and time-varying covariates           | Longitudinal binary analysis with time varying binary indicating SARS-CoV-2 serology. Both population average (PA) and subject-specific (SS) models to be considered given time-varying nature of the SARS-CoV-2 variable |

1  
2  
3  
4  
5  
6  
7  
8  
9  
10  
11  
12  
13  
14  
15  
16  
17  
18  
19  
20  
21  
22  
23  
24  
25  
26  
27  
28  
29  
30  
31  
32  
33  
34  
35  
36  
37  
38  
39  
40  
41  
42  
43  
44  
45  
46

**Table 1. Study objectives for Phases I and II, how each objective will be achieved, and statistical analysis for each objective**

OR - ODDS RATIOS; 95% CIs – 95% confidence intervals; HR – Hazard ratios; ROC- Receiving operator characteristic; AUC - area under the curve; GEE – generalized estimating equations



1  
2  
3  
4 *Recruitment - Phase I (pre-COVID-19; May 2019 to March 2020)*

5  
6 Children and adolescents aged 5–17 years were recruited either while attending  
7 emergency rooms (ERs) with an asthma attack or through daily registries and contact  
8 telephone numbers of patients attending the ERs with an asthma attack. From May  
9 2019, eligible patients (Table 2) were provided with a study information sheet on  
10 discharge and their parents were contacted to arrange an interview at a hospital  
11 consulting room 10–14 days later when they were recruited into the study after  
12 providing informed written parental consent and minor assent (8 years and older).  
13  
14  
15  
16  
17  
18  
19

20  
21 *Recruitment – Phase II (peri-COVID-19; March 2021 to March 2022)*

22 The COVID-19 pandemic had a dramatic impact on our ability to recruit children with  
23 asthma attacks in the three study hospitals that resulted in the suspension of  
24 recruitment in March 2020. This was owing to the reassignment of all 3 hospitals to  
25 COVID-19-only activities for prolonged periods and the imposition of a legally enforced  
26 lockdown nationally. Figure 2 shows the number of potentially eligible children  
27 identified in the 3 study hospitals by month in the period prior to COVID-19 and during  
28 the pandemic. There was as a marked reduction in eligible children attending the ERs  
29 immediately following the imposition of lockdown on 16th March 2020 and in the  
30 following 8 months. In the period following the initial lockdown and other mitigation  
31 strategies to reduce transmission of SARS-CoV-2, within the sample of asthmatic  
32 children recruited into Phase I of the study, there was evidence of dramatic reduction  
33 in health service attendance rather than changes in the incidence of attacks [19]. To  
34 allow continued recruitment, a second phase (Phase II) of the study was started with  
35 eligibility criteria modified to include children and adolescents aged 5–17 years  
36 registered as having asthma in patient registries at the study hospitals in Cuenca and  
37 Portoviejo (Quito was not included in Phase II because of logistic issues in that specific  
38 setting). The child's parent was contacted by telephone and asked about the child's  
39 current asthma symptoms. Children with current symptoms were considered eligible.  
40 Eligibility criteria for Phase I and II are shown in Table 2.  
41  
42  
43  
44  
45  
46  
47  
48  
49  
50  
51  
52  
53  
54  
55  
56  
57  
58  
59  
60

**Table 2 Eligibility criteria for entry into Phase I and Phase II of study**

| Characteristic           | Phase I                                                                                                                                                                                                                                                                                                             | Phase II                                                                                                                                                                                                                                                                                      |
|--------------------------|---------------------------------------------------------------------------------------------------------------------------------------------------------------------------------------------------------------------------------------------------------------------------------------------------------------------|-----------------------------------------------------------------------------------------------------------------------------------------------------------------------------------------------------------------------------------------------------------------------------------------------|
| Setting/study population | Public hospital ERs in Quito, Cuenca, and Portoviejo                                                                                                                                                                                                                                                                | Public hospital registry of patients with asthma in Cuenca and Portoviejo                                                                                                                                                                                                                     |
| Inclusion criteria       | <ol style="list-style-type: none"> <li>1. Aged 5-17 years</li> <li>2. <b>Acute asthma attack attending ERs at public hospitals</b></li> <li>3. Living within 12 km of public hospital</li> <li>4. Informed written consent from parents</li> <li>5. Minor assent from children <math>\geq 8</math> years</li> </ol> | <ol style="list-style-type: none"> <li>1. Aged 5-17 years</li> <li>2. <b>Wheeze within the last 6 months</b></li> <li>3. Living within 12 km of public hospital</li> <li>4. Informed written consent from parents</li> <li>5. Minor assent from children <math>\geq 8</math> years</li> </ol> |
| Exclusion criteria       | <ol style="list-style-type: none"> <li>1. Other chronic disease</li> <li>2. Living <math>&gt;12</math> km from public hospital</li> </ol>                                                                                                                                                                           | <ol style="list-style-type: none"> <li>1. Other chronic disease</li> <li>2. Living <math>&gt;12</math> km from public hospital</li> </ol>                                                                                                                                                     |

### *Data collection*

A study manager supervised day-to-day activities of a dedicated teams (physician and nurse) of trained study personnel based in each of the public hospitals. Each participant was followed up for 12 months in Phase I and at least 6 months in Phase II. Standardized procedures were used throughout (Figure 2). Subjects were evaluated at monthly intervals using face-to-face and telemonitoring for follow-up. Both phases include face-to-face evaluations (evaluations at baseline, 2, 4, 6, 9, and 12 months in Phase I; baseline, 6, and 12 months in Phase II). Between March 2020 and March 2021, all face-to-face evaluations in Phase I were changed to telemonitoring apart from the final evaluation at 12 months which remained face-to-face, where possible. Final face-to-face evaluations were done in March-April 2021 on participants who had completed 12 months of follow-up between June 2019 and February 2020. The site of face-to-face evaluations was changed to either a clinic or home visit depending on the preference of the child's parents. Study procedures were the same in both phases of the study (Figure 2) with the following exceptions: 1) procedures requiring face-to-face evaluations at 6 and 12 months in Phase I (C-ACT, and PAQLQ) were dropped in Phase

1  
2  
3  
4 II and the remaining instruments were administered by telemonitoring; 2) blood  
5 samples (baseline, 6, and 12 months) are being collected from those recruited into  
6 Phase II of the study for measurement of anti-SARS-CoV-2 IgG antibodies; and 3)  
7 measurement of lung function and fractional exhaled nitric oxide was suspended from  
8 March 2020 because of risks from potentially hazardous infectious aerosols until a time  
9 when this procedure can be done safely. Medications (inhaled salbutamol and  
10 fluticasone) were provided free of charge to participants when prescribed by a hospital  
11 physician and there was no medication in the hospital pharmacy. The study team  
12 ensured adequate inhaler technique during face-to-face clinic or home visits. Study  
13 personnel did not interfere with treatment indications of hospital staff.  
14  
15  
16  
17  
18  
19  
20  
21  
22  
23

24 **Figure 2. Study procedures during baseline evaluation and follow-up in Phases I (A)**  
25 **and II (B) of study.**

26 **BaselineQ – General questionnaire based on Phase II of the International Study of**  
27 **Asthma and Allergies in Childhood; AFCQ- Asthma Family Costs Questionnaire; NAKQ**  
28 **– Newcastle Asthma Knowledge Questionnaire; ACT – Asthma Control Questionnaire**  
29 **(>11 years); C-ACT – Child Asthma Control Questionnaire (>=12 years); ARQ – Asthma**  
30 **Recurrence Questionnaire; FeNO – fractional exhaled nitric oxide. Follow-up in Phase**  
31 **I was for 12 months and in Phase II for a minimum of 6 months.**  
32  
33  
34  
35  
36  
37  
38  
39  
40  
41  
42

#### 43 *Questionnaires at baseline and follow-up*

44 The following questionnaires were used as indicated in Figure 2; i) asthma  
45 questionnaire to collect information on history of asthma symptoms, treatment and  
46 management, and potential risk factors for asthma attacks. This questionnaire has  
47 been previously adapted from ISAAC Phase II and extensively field-tested for children  
48 and adolescents with asthma [13,26]; ii) Asthma Recurrence Questionnaire (ARQ) -  
49 questionnaire to monitor recurrence of asthma symptoms and monitor treatment  
50 during follow-up [13], and including symptoms and diagnosis of COVID-19 in Phase II;  
51 iii) Childhood Asthma Control Test (C-ACT) [45], completed by the child and parent for  
52 children aged <12 years or the ACT [46] for those aged  $\geq 12$  years; iv) Pediatric Asthma  
53  
54  
55  
56  
57  
58  
59  
60

Quality of Life Questionnaire (PAQLQ) [47]; v) Newcastle Asthma Knowledge Questionnaire (NAKQ) [48,49] validated in a Spanish-speaking populations; and vi) Asthma Family Cost Questionnaire (AFCQ) [50]. Data collection is summarized in Table 3.

**Table 3 Data collection at baseline and during follow-up in Phases I and II of study**

| Data collected                 | Baseline | Month 6 | Month 12 | Monthly |
|--------------------------------|----------|---------|----------|---------|
| Asthma diagnosis               | I/II     |         |          |         |
| History of asthma symptoms     | I/II     |         |          |         |
| Current asthma symptoms        | I/II     | I/II    | I/II     | I/II    |
| ER visits/ hospitalizations    | I/II     | I/II    | I/II     | I/II    |
| Asthma medications             | I/II     | I/II    | I/II     | I/II    |
| Asthma control (C-ACT/ACT)     | I/II     | (I)/II  | (I)/II   |         |
| Asthma quality of life (PAQLQ) | I/II     | (I)/II  | (I)/II   |         |
| Asthma knowledge (NAKQ)        | I        |         |          |         |
| Lung function                  | I/(II)   | (I)/II  | (I)      |         |
| Reversibility                  | I/(II)   | (I)/II  | (I)      |         |
| FeNO                           | I/II     | (I)/II  | (I)/II   |         |
| Anti-SARS-CoV-2 IgG antibodies | II       | II      | II       |         |
| COVID-19 symptoms or diagnosis | II       | II      | II       | II      |

FeNO – fractional exhaled nitric oxide. (I) – data collection where possible

*Lung function test and Fractional Exhaled Nitric Oxide (FeNO)*

1  
2  
3  
4 Lung function testing is being done according to American Thoracic Society (ATS)  
5 criteria using a portable ultrasonic spirometer (EasyOne® device, ndd Medical  
6 Technologies). Global Lung Function Initiative (GLI-2012) reference values will be used  
7  
8 to calculate z-scores depending on age, sex, height, and ethnicity [51]. Lung function is  
9  
10 being measured before and before and after 200 ug salbutamol administered through  
11  
12 a spacer with a positive test for airways reactivity defined as an increase in FEV<sub>1</sub> of  
13  
14  $\geq 12\%$ . Fractional exhaled nitric oxide (FeNO) is being measured in parts per billion  
15  
16 using NObreath (Bedfont Scientific, UK). As a consequence of lockdown and mitigation  
17  
18 strategies to prevent transmission of SARS-CoV-2, measurement of lung function and  
19  
20 FeNO was suspended in March 2020. FeNO measurement, a low effort procedure that  
21  
22 carries a minimal risk of generating aerosols [52,53], was resumed in March 2021 for  
23  
24 12-month evaluations in Phase I and baseline evaluations in Phase II. FeNO is being  
25  
26 done following the recommendations of the manufacturer to minimize potential risks  
27  
28 [54]. Spirometry, which often induces cough, will be resumed, only if the procedure  
29  
30 can be done without risk to staff, patients, and their families.  
31  
32

### 33 *Blood samples*

34  
35 Blood sample are being taken at baseline, 6 and 12 months in Phase II. Blood is drawn  
36  
37 from an antecubital vein into a 4 mL plastic tube containing EDTA as anticoagulant  
38  
39 (Vacutainer, BD). After centrifugation, plasma is stored at -20C until analysis. Levels of  
40  
41 IgG specific for SARS-CoV-2 are being measured using a validated enzyme linked  
42  
43 immunosorbent assay [55].  
44  
45

### 46 *Biosafety precautions relating to the COVID-19 pandemic*

47  
48 Personnel gathering data during face-to-face visits have been trained to use  
49  
50 appropriate personal protective equipment according to international guidelines  
51  
52 [56–58]. Immediately prior to a home or clinic visit, the child’s carer is telephoned  
53  
54 about potential symptoms or a COVID-19 diagnosis among family members or close  
55  
56 contacts – if any symptoms are reported the visit is rescheduled after 2 weeks.  
57  
58

### 59 *Sample size considerations*

60

1  
2  
3  
4 A sample size of 450 patients was proposed for Phase I, based on a binary outcome  
5 variable of any recurrence of an asthma attack within 12 months or so. We used an  
6 estimated recurrence risk of about 50% during 6 months follow-up from a similar  
7 population in Ecuador [13]. The study should collect between 10 and 16 outcome  
8 events per each potential explanatory variable for robust results (i.e. for at least 80%  
9 power, equivalent to a type 2 error of less than 20% as proven by simulation studies).  
10 Assuming 10 explanatory variables are considered, in the worst-case scenario,  
11  $10 \times 16 = 160$  such events would be required for the upper limit of 16 events for each  
12 explanatory variable. Given a 50% risk of recurrence, a minimum of  $160 \times 2 = 320$   
13 subjects will be needed. Allowing for 20% attrition/loss during follow up given the  
14 longitudinal nature of the study, we needed approximately 400 patients which we set  
15 more conservatively at 450 [59–62]. However, we do not expect a multivariable model  
16 to exceed 10 predictors. There is the possibility of differences between populations  
17 recruited during the 2 phases of the study. If this is not the case, an indicator variable  
18 which annotates the two phases will be added to the set of predictors and 450 patients  
19 would still allow at least 80% power under the conditions described. For example, if 11  
20 predictors are considered, 352 patients would be required or a total of 440 allowing  
21 for 20% attrition. If there are substantial differences between subjects recruited in the  
22 two phases, analyses will consider up to 10 events per explanatory variable requiring  
23 100 events per phase among 200 participants followed-up or 250 recruited (allowing  
24 for 20% attrition). The latter scenario will require recruitment of a total of 500 during  
25 the two phases, a target that we are confident we can achieve.  
26  
27  
28  
29  
30  
31  
32  
33  
34  
35  
36  
37  
38  
39  
40  
41  
42  
43  
44  
45

46 The definition of an asthma attack in both phases of the study is an episode of acute  
47 wheezing requiring an unscheduled visit to a health professional (including visits to  
48 ERs) and which is controlled by  $\beta_2$ -agonist bronchodilator treatment. The original  
49 definition for an asthma attack in Phase I that included ER attendance had to be  
50 modified in the light of changes in health seeking behaviour caused by the COVID-19  
51 pandemic and fear of contagion in hospitals and other acute health facilities [19].  
52 Potential explanatory variables include age, gender, ethnicity, socioeconomic status,  
53 medication use, asthma attacks and use of systemic corticosteroids in year prior to  
54  
55  
56  
57  
58  
59  
60

1  
2  
3  
4 recruitment, asthma control test score, and study centre. Given changes to the Phase  
5 I protocol, an additional variable (for recruitment from ERs vs. hospital lists) will be  
6 considered as an effect modifier. Sub-group analyses of Phase II will include SARS-CoV-  
7 2 seropositivity as an explanatory variable. Secondary outcomes will asthma control  
8 score and economic costs to the patient's family.  
9  
10  
11  
12  
13

### 14 15 *Statistical analyses*

16  
17 The statistical models to be used by study objective are summarized in Table 1. The  
18 primary outcome will be any asthma attack recurrence during 12 months of follow-up  
19 in Phase I and at least 6 months in Phase II. Logistic and linear regression, and survival  
20 analyses will be used. For the latter, if no re-attendance related to an asthma attack  
21 occurred during the follow-up period, the patient is considered (right) censored. The  
22 general assumption for time-to-event (survival analysis) is that the censoring is non-  
23 informative, i.e. it is independent of the events (asthma attacks). Under this  
24 assumption, the results should not be qualitatively different from those inferred from  
25 a logistic regression. Odds ratios and/or hazard ratios and their corresponding p-values  
26 and 95% CIs will measure the associations between asthma attack recurrence and  
27 explanatory variables, and their statistical significance and uncertainty. The Cox  
28 proportional hazard (PH) semi-parametric technique allows no assumption to be made  
29 on the baseline hazard; nevertheless, proportionality of the hazards should hold. The  
30 latter assumption can be tested on the basis of Shoenfeld residuals after fitting models  
31 to the data. If unsatisfactory, alternative parametric models will be considered after  
32 understanding the distributional assumptions on the data such that the baseline  
33 hazard function is modelled appropriately. After exploring the data as described above,  
34 a forward-backward elimination survival analysis would be applied to determine the  
35 most parsimonious model for an adjusted multivariable model; that is the model with  
36 the least number of predictors yet explaining most of the variability in the data.  
37 Penalized-likelihood criteria such as AIC or BIC will be used to choose between non-  
38 nested models – nevertheless based on complete observations only.  
39  
40  
41  
42  
43  
44  
45  
46  
47  
48  
49  
50  
51  
52  
53  
54  
55  
56  
57  
58  
59  
60

1  
2  
3  
4 Hosmer-Lemeshow measure of goodness of fit would be employed for logistic  
5 regression models with a p-value of less than 0.05 indicating a poor fit to the data.  
6  
7 Model validation will be done by splitting the data set into training-testing subsets  
8 (logistic regression setting). Cross validation techniques will be used to understand the  
9 prediction power of the corresponding logistic regression model using area under the  
10 receiver operator curve, prior to propose the model entering the clinical practice with  
11 the view of elaborating a prognostic model. In survival setting it is also possible that  
12 the precise time of the attacks may be missed but recorded as between two time  
13 points. This would fall into interval censored data as an alternative to survival setting  
14 in which the precise time of the event is required.  
15  
16  
17  
18  
19  
20  
21  
22  
23

24 Multiple recurrences of asthma attacks within the follow-up period will generate a  
25 longitudinal binary outcome, with multiple records for each participant over follow-  
26 up. The hierarchical structure of the data requires special inferential techniques which  
27 account for the two sources of variability: that of between participants and within  
28 participants. Three different modelling approaches will be considered: generalized  
29 estimation equation, mixed models, and random effects survival models. The first  
30 approach provides population-average estimates, the second provides subject-specific  
31 estimates while the third is also known as shared frailty survival model. A frailty is a  
32 latent random effect which enters multiplicatively on the hazard function and accounts  
33 for the multiple failures setting and/or for the clustered aspect of the data.  
34  
35  
36  
37  
38  
39  
40  
41  
42  
43

44 Complete data analyses will be done under missing completely at random  
45 assumptions. However, patterns in missing data will be explored and methods to  
46 evaluate potential impact of missing data on estimates will be used as appropriate such  
47 as multiple imputations using chained equations (MICE) accompanied by a sensitivity  
48 analysis to the missing data assumptions [63–65]. Analyses will use STATA (StataCorp.  
49 2017. Stata Statistical Software: Release 15. College Station, TX: StataCorp LLC) or R (R  
50 Core Team (2013)).  
51  
52  
53  
54  
55  
56  
57  
58

## 59 Discussion

60



1  
2  
3  
4 The prevalence of childhood asthma has increased in many LMICs over the past 50 or  
5 so years where asthma attacks are a growing burden to health systems [2]. There are  
6 limited data on determinants of asthma attacks in children and adolescents from LMIC  
7 settings [18], and a need for prospective studies to identify risk factors for asthma  
8 attacks so that the limited resources available in low-resource settings can be focused  
9 on those children most likely to suffer recurrent attacks to reduce morbidity and  
10 economic costs to health systems and patients' families. The Asthma ATTACK study  
11 aims to identify risk factors associated with asthma attacks among children and  
12 adolescents attending emergency rooms in public hospitals in three Ecuadorian cities.  
13  
14  
15  
16  
17  
18  
19  
20  
21

22 This study provides a range of climatic settings in Ecuador from high altitude (Cuenca  
23 and Quito) to sea level (Portoviejo). Study activities were interrupted in March 2020  
24 by the COVID-19 pandemic resulting in a suspension of recruitment in hospital ERs  
25 owing to dramatic changes in access to and use of health facilities. As a consequence,  
26 the study protocol was modified to allow re-initiation of recruitment and also the  
27 evaluation of the effect of exposures to SARS-CoV-2 on risk of asthma attacks and  
28 symptoms in children. The study will help fill an unmet knowledge gap on the effects  
29 of SARS-CoV-2 on pediatric asthma, particularly from low-resource LMIC settings [19].  
30  
31  
32  
33  
34  
35  
36  
37  
38

### 39 *Study limitations*

40 A potential limitation is recruitment of sufficient subjects with an acute asthma attack  
41 attending emergency rooms at the three public hospitals and ensuring monthly follow-  
42 up in Phase I of the study. The COVID-19 pandemic had a major impact on health  
43 seeking behaviours while mitigation strategies to control transmission of the novel  
44 coronavirus, SARS-CoV-2, resulted in marked declines in the circulation of respiratory  
45 viruses that are considered to cause a high proportion of asthma attacks [66]. A shift  
46 to telemonitoring during the COVID-19 pandemic helped ensure almost complete  
47 follow-up of those recruited prior to March 2020, although procedures requiring the  
48 presence of the patient or that generated potentially hazardous aerosols (e.g.  
49 spirometry) had to be suspended. Declines in circulating respiratory viruses [67]  
50 because of mitigation strategies against COVID-19 could reduce the number of  
51  
52  
53  
54  
55  
56  
57  
58  
59  
60

1  
2  
3  
4 recurrence events and hence the power of the study. Phase II is recruiting known  
5 asthmatic children and adolescents with recent asthma symptoms and following them-  
6 up for asthma attacks for at least 6 months. The change in criteria should allow  
7 sufficient subjects to be recruited given the impact of COVID-19 pandemic on health  
8 attendance behaviours, although continuing mitigation measures may reduce  
9 recurrence. Follow-up in Phase II is being done through telemonitoring and a few  
10 scheduled face-to-face visits either to the study clinic or the participant's home  
11 depending on individual preferences. Other potential limitations include missing of  
12 events although monthly contacts should minimize these. Significant losses to follow-  
13 up that could lead to selection bias are being minimized by regular contacts with  
14 caregivers including home visits, and confounding should be reduced by the collection  
15 of data on a wide variety of known potential risk factors and confounders including  
16 treatments received and adherence to those treatments.  
17  
18  
19  
20  
21  
22  
23  
24  
25  
26  
27  
28  
29

### 30 **Ethics and dissemination**

31 Ethical approval for Phase I was obtained from the Ethics Committee of the Hospital  
32 General Docente de Calderon (CEISH-HGDC 2019-001) and for Phase II from the  
33 Ecuadorian Ministry of Public Health COVID-19 Ethics Committee (MSP-CGDES-2021-  
34 0041-O N° 096-2021). The study results will be disseminated through presentations at  
35 conferences and to key stakeholder groups including policy makers, postgraduate  
36 student theses, peer-review publications, and on a study website.  
37  
38  
39  
40  
41  
42  
43  
44

### 45 **References**

- 46  
47 1. Reddel HK, Busse WW, Pedersen S, Tan WC, Chen Y-Z, Jorup C, et al. Should  
48 recommendations about starting inhaled corticosteroid treatment for mild  
49 asthma be based on symptom frequency: a post-hoc efficacy analysis of the  
50 START study. *Lancet*. 2017;389: 157–166.  
51  
52
- 53 2. Pearce N, Ait-Khaled N, Beasley R, Mallol J, Keil U, Mitchell E, et al. Worldwide  
54 trends in the prevalence of asthma symptoms: phase III of the International  
55 Study of Asthma and Allergies in Childhood (ISAAC). *Thorax*. 2007;62: 758–766.  
56  
57
- 58 3. Hasegawa K, Bittner JC, Nonas SA, Stoll SJ, Watase T, Gabriel S, et al. Children  
59 and Adults With Frequent Hospitalizations for Asthma Exacerbation, 2012-2013:  
60

- 1  
2  
3  
4 A Multicenter Observational Study. *J Allergy Clin Immunol Pract.* 2015;3: 751–  
5 8.e1.  
6
- 7  
8 4. Deschildre A, Pichavant M, Engelmann I, Langlois C, Drumez E, Pouessel G, et al.  
9 Virus-triggered exacerbation in allergic asthmatic children: neutrophilic airway  
10 inflammation and alteration of virus sensors characterize a subgroup of patients.  
11 *Respir Res.* 2017;18: 191.  
12
- 13  
14 5. Murray CS, Foden P, Sumner H, Shepley E, Custovic A, Simpson A. Preventing  
15 Severe Asthma Exacerbations in Children. A Randomized Trial of Mite-  
16 Impermeable Bedcovers. *Am J Respir Crit Care Med.* 2017;196: 150–158.  
17
- 18  
19 6. Taquechel K, Diwadkar AR, Sayed S, Dudley JW, Grundmeier RW, Kenyon CC, et  
20 al. Pediatric Asthma Health Care Utilization, Viral Testing, and Air Pollution  
21 Changes During the COVID-19 Pandemic. *J Allergy Clin Immunol Pract.* 2020;8:  
22 3378–3387.e11.  
23
- 24  
25 7. Bønnelykke K, Sleiman P, Nielsen K, Kreiner-Møller E, Mercader JM, Belgrave D,  
26 et al. A genome-wide association study identifies CDHR3 as a susceptibility locus  
27 for early childhood asthma with severe exacerbations. *Nat Genet.* 2014;46: 51–  
28 55.  
29
- 30  
31 8. Fischer GB, Sarria EE, Camargos P, Mocelin HT, Soto-Quiroz M, Cruz AA, et al.  
32 Childhood asthma in low and middle-income countries: Where are we now?  
33 *Paediatr Respir Rev.* 2019;31: 52–57.  
34
- 35  
36 9. Carroll WD, Wildhaber J, Brand PLP. Parent misperception of control in  
37 childhood/adolescent asthma: the Room to Breathe survey. *Eur Respir J.*  
38 2012;39: 90–96.  
39
- 40  
41 10. Vervloet M, van Dijk L, Spreeuwenberg P, Price D, Chisholm A, Van Ganse E, et  
42 al. The Relationship Between Real-World Inhaled Corticosteroid Adherence and  
43 Asthma Outcomes: A Multilevel Approach. *J Allergy Clin Immunol Pract.* 2020;8:  
44 626–634.  
45
- 46  
47 11. Fleming L. Asthma exacerbation prediction: recent insights. *Curr Opin Allergy  
48 Clin Immunol.* 2018;18: 117–123.  
49
- 50  
51 12. Nunes C, Pereira AM, Morais-Almeida M. Asthma costs and social impact.  
52 *Asthma Res Pract.* 2017;3: 1.  
53
- 54  
55 13. Ardura-Garcia C, Arias E, Hurtado P, Bonnett LJ, Sandoval C, Maldonado A, et al.  
56 Predictors of severe asthma attack re-attendance in Ecuadorian children: a  
57 cohort study. *Eur Respir J.* 2019;54. doi:10.1183/13993003.02419-2018  
58
- 59  
60 14. Smiley M, Sicignano N, Rush T, Lee R, Allen E. Outcomes of follow-up care after  
an emergency department visit among pediatric asthmatics in the military  
health system. *J Asthma.* 2016;53: 816–824.

15. Beck AF, Simmons JM, Huang B, Kahn RS. Geomedicine: area-based socioeconomic measures for assessing risk of hospital reutilization among children admitted for asthma. *Am J Public Health*. 2012;102: 2308–2314.
16. Zipkin R, Schragger SM, Nguyen E, Mamey MR, Banuelos I, Wu S. Association between pediatric home management plan of care compliance and asthma readmission. *J Asthma*. 2017;54: 761–767.
17. Moncrief T, Beck AF, Simmons JM, Huang B, Kahn RS. Single parent households and increased child asthma morbidity. *J Asthma*. 2014;51: 260–266.
18. Ardura-Garcia C, Stolbrink M, Zaidi S, Cooper PJ, Blakey JD. Predictors of repeated acute hospital attendance for asthma in children: A systematic review and meta-analysis. *Pediatr Pulmonol*. 2018;53: 1179–1192.
19. Ochoa-Avilés AM, Ochoa-Avilés C, Morillo-Argudo DA, Molina-Cando MJ, Rodas-Espinoza CR, Chis Ster I, et al. Impact of COVID-19 pandemic on asthma symptoms and management: A prospective analysis of asthmatic children in Ecuador. *World Allergy Organ J*. 2021;14: 100551.
20. McGeachie MJ, Yates KP, Zhou X, Guo F, Sternberg AL, Van Natta ML, et al. Patterns of Growth and Decline in Lung Function in Persistent Childhood Asthma. *N Engl J Med*. 2016;374: 1842–1852.
21. Forno E, Gogna M, Cepeda A, Yañez A, Solé D, Cooper P, et al. Asthma in Latin America. *Thorax*. 2015;70: 898–905.
22. Alith MB, Gazzotti MR, Nascimento OA, Jardim JR. Impact of asthma control on different age groups in five Latin American countries. *World Allergy Organ J*. 2020;13: 100113.
23. Gold LS, Thompson P, Salvi S, Faruqi RA, Sullivan SD. Level of asthma control and health care utilization in Asia-Pacific countries. *Respir Med*. 2014;108: 271–277.
24. Sastre J, Fabbri LM, Price D, Wahn HU, Bousquet J, Fish JE, et al. Insights, attitudes, and perceptions about asthma and its treatment: a multinational survey of patients from Europe and Canada. *World Allergy Organ J*. 2016;9: 13.
25. Reddel HK, Sawyer SM, Everett PW, Flood PV, Peters MJ. Asthma control in Australia: a cross-sectional web-based survey in a nationally representative population. *Medical Journal of Australia*. 2015. pp. 492–496. doi:10.5694/mja14.01564
26. Ardura-Garcia C, Vaca M, Oviedo G, Sandoval C, Workman L, Schuyler AJ, et al. Risk factors for acute asthma in tropical America: a case-control study in the City of Esmeraldas, Ecuador. *Pediatric Allergy and Immunology*. 2015. pp. 423–430. doi:10.1111/pai.12401

- 1  
2  
3  
4 27. Cruz AA, Souza-Machado A, Franco R, Souza-Machado C, Ponte EV, Santos PM,  
5 et al. The Impact of a Program for Control of Asthma in a Low-Income Setting.  
6 World Allergy Organization Journal. 2010. pp. 167–174.  
7 doi:10.1097/wox.0b013e3181dc3383  
8  
9
- 10 28. Cusack RP, Satia I, O’Byrne PM. Asthma maintenance and reliever therapy:  
11 Should this be the standard of care? Ann Allergy Asthma Immunol. 2020;125:  
12 150–155.  
13  
14
- 15 29. Abrams EM, Becker AB, Szeffler SJ. Paradigm Shift in Asthma Therapy for  
16 Adolescents: Should It Apply to Younger Children as Well? JAMA pediatrics.  
17 2020. pp. 227–228.  
18  
19
- 20 30. Abrams EM, Shaker M, Greenhawt M, Fernandes RM, Sinha I. Treatment of mild-  
21 to-moderate asthma in childhood and adolescence in 2021. Lancet Respir Med.  
22 2021;9: 443–445.  
23  
24
- 25 31. Reddel HK, FitzGerald JM, Bateman ED, Bacharier LB, Becker A, Brusselle G, et al.  
26 GINA 2019: a fundamental change in asthma management: Treatment of  
27 asthma with short-acting bronchodilators alone is no longer recommended for  
28 adults and adolescents. Eur Respir J. 2019;53. doi:10.1183/13993003.01046-  
29 2019  
30
- 31 32. Neffen H, Chahuàn M, Hernández DD, Vallejo-Perez E, Bolivar F, Sánchez MH, et  
32 al. Key factors associated with uncontrolled asthma – the Asthma Control in  
33 Latin America Study. Journal of Asthma. 2020. pp. 113–122.  
34 doi:10.1080/02770903.2018.1553050  
35  
36
- 37 33. Liu S, Zhi Y, Ying S. COVID-19 and Asthma: Reflection During the Pandemic. Clin  
38 Rev Allergy Immunol. 2020;59: 78–88.  
39  
40
- 41 34. Wang Y, Ao G, Qi X, Xie B. The association between COVID-19 and asthma: A  
42 systematic review and meta-analysis. Clinical & Experimental Allergy. 2020. pp.  
43 1274–1277. doi:10.1111/cea.13733  
44  
45
- 46 35. Hartmann-Boyce J, Gunnell J, Drake J, Otunla A, Suklan J, Schofield E, et al.  
47 Asthma and COVID-19: review of evidence on risks and management  
48 considerations. BMJ Evid Based Med. 2020. doi:10.1136/bmjebm-2020-111506  
49
- 50 36. Peters MC, Sajuthi S, Deford P, Christenson S, Rios CL, Montgomery MT, et al.  
51 COVID-19-related Genes in Sputum Cells in Asthma. Relationship to  
52 Demographic Features and Corticosteroids. Am J Respir Crit Care Med.  
53 2020;202: 83–90.  
54  
55
- 56 37. Yamaya M, Nishimura H, Deng X, Sugawara M, Watanabe O, Nomura K, et al.  
57 Inhibitory effects of glycopyrronium, formoterol, and budesonide on coronavirus  
58 HCoV-229E replication and cytokine production by primary cultures of human  
59 nasal and tracheal epithelial cells. Respir Investig. 2020;58: 155–168.  
60

- 1  
2  
3  
4 38. Schultze A, Douglas I. COVID-19 and inhaled corticosteroids—another piece in  
5 an expanding puzzle. *The Lancet Respiratory Medicine*. 2021. pp. 674–675.  
6 doi:10.1016/s2213-2600(21)00076-x  
7  
8  
9 39. Papadopoulos NG, Mathioudakis AG, Custovic A, Deschildre A, Phipatanakul W,  
10 Wong G, et al. Childhood asthma outcomes during the COVID-19 pandemic:  
11 Findings from the PeARL multi-national cohort. *Allergy*. 2021;76: 1765–1775.  
12  
13 40. Kaye L, Theye B, Smeenk I, Gondalia R, Barrett MA, Stempel DA. Changes in  
14 medication adherence among patients with asthma and COPD during the  
15 COVID-19 pandemic. *J Allergy Clin Immunol Pract*. 2020;8: 2384–2385.  
16  
17 41. Romero NC, Cisneros-Caceres MJ, Granadillo E, Aragao E, Romero-Sandoval A,  
18 Barbosa C, Barreto de Oliveira AL, et al. Health workers' perspectives on asthma  
19 care coordination between primary and specialised healthcare in the COVID-19  
20 pandemic: a protocol for a qualitative study in Ecuador and Brazil. *BMJ Open*  
21 2021;11:e052971.  
22  
23 42. Instituto Nacional de Meteorología e Hidrología. Anuario Meteorológico Nro. 53-  
24 2013. Quito, Ecuador: INAMHI; 2015.  
25  
26 43. Ministerio de Salud Pública. Manual del modelo de atención integral del sistema  
27 nacional de salud familiar comunitario e intercultural (MAIS-FCI). Ecuador: MAIS-  
28 FCI; 2012 [cited 22 Apr 2021]. Available:  
29 <https://es.scribd.com/document/338645477/Manual-MAIS-MSP12-12-12-pdf>  
30  
31 44. Lucio R, Villacrés N, Henríquez R. Sistema de salud de Ecuador. *Salud pública de*  
32 *México*. 2011;53: s177–s187.  
33  
34 45. Liu AH, Zeiger R, Sorkness C, Mahr T, Ostrom N, Burgess S, et al. Development  
35 and cross-sectional validation of the Childhood Asthma Control Test. *J Allergy*  
36 *Clin Immunol*. 2007;119: 817–825.  
37  
38 46. Nathan RA, Sorkness CA, Kosinski M, Schatz M, Li JT, Marcus P, et al.  
39 Development of the asthma control test☆A survey for assessing asthma control.  
40 *Journal of Allergy and Clinical Immunology*. 2004. pp. 59–65.  
41 doi:10.1016/j.jaci.2003.09.008  
42  
43 47. Juniper EF, Guyatt GH, Feeny DH, Ferrie PJ, Griffith LE, Townsend M. Measuring  
44 quality of life in children with asthma. *Qual Life Res*. 1996;5: 35–46.  
45  
46 48. Fitzclarence CA, Henry RL. Validation of an asthma knowledge questionnaire. *J*  
47 *Paediatr Child Health*. 1990;26: 200–204.  
48  
49 49. Praena Crespo M, Lora Espinosa A, Aquino Llinares N, Sánchez Sánchez AM,  
50 Jiménez Cortés A. [The Spanish version of the Newcastle Asthma Knowledge  
51 Questionnaire for parents of children with asthma (NAKQ). Transcultural  
52 adaptation and reliability analysis]. *An Pediatr* . 2009;70: 209–217.  
53  
54  
55  
56  
57  
58  
59  
60

- 1  
2  
3  
4 50. Franco R, Nascimento HF, Cruz AA, Santos AC, Souza-Machado C, Ponte EV, et al.  
5 The economic impact of severe asthma to low-income families. *Allergy*. 2009;64:  
6 478–483.  
7
- 8  
9 51. Quanjer PH, Stanojevic S, Cole TJ, Baur X, Hall GL, Culver BH, et al. Multi-ethnic  
10 reference values for spirometry for the 3-95-yr age range: the global lung  
11 function 2012 equations. *Eur Respir J*. 2012;40: 1324–1343.  
12
- 13 52. Association for Respiratory Technology & Physiology. ARTP COVID-19 GROUP:  
14 Practical guidance for increasing Lung Function and Sleep activity during COVID-  
15 19 Endemic Phase. Aug 2020 [cited 25 Jan 2021]. Available:  
16 [https://www.artp.org.uk/write/MediaUploads/Standards/COVID19/ARTP\\_COVI](https://www.artp.org.uk/write/MediaUploads/Standards/COVID19/ARTP_COVID_Practical_Innovations_Vers1.2_final.pdf)  
17 [D\\_Practical\\_Innovations\\_Vers1.2\\_final.pdf](https://www.artp.org.uk/write/MediaUploads/Standards/COVID19/ARTP_COVID_Practical_Innovations_Vers1.2_final.pdf)  
18  
19
- 20 53. PCRS. Position Statement Diagnostic work up of the patient presenting with  
21 respiratory symptoms during the COVID-19 pandemic. In: The Primary Care  
22 Respiratory Society [Internet]. 17 Sep 2020 [cited 25 Jan 2021]. Available:  
23 [https://www.pcrs-uk.org/sites/pcrs-uk.org/files/resources/COVID19/Diagnosis-](https://www.pcrs-uk.org/sites/pcrs-uk.org/files/resources/COVID19/Diagnosis-asthma-COPD-during-COVID-19-v2-17-September-2020.pdf)  
24 [asthma-COPD-during-COVID-19-v2-17-September-2020.pdf](https://www.pcrs-uk.org/sites/pcrs-uk.org/files/resources/COVID19/Diagnosis-asthma-COPD-during-COVID-19-v2-17-September-2020.pdf)  
25  
26
- 27 54. Coronavirus & the 2nd Generation NObreath - Update. In: NObreath [Internet].  
28 [cited 25 Jan 2021]. Available: [https://www.nobreathfeno.com/coronavirus-and-](https://www.nobreathfeno.com/coronavirus-and-the-2nd-generation-nobreath-update/)  
29 [the-2nd-generation-nobreath-update/](https://www.nobreathfeno.com/coronavirus-and-the-2nd-generation-nobreath-update/)  
30  
31
- 32 55. Guevara Á, Vivero S, Nipaz V, Guaraca V, Coloma J. A Low-Cost SARS-CoV-2 rRBD  
33 ELISA to Detect Serostatus in Ecuadorian Population with COVID-19. *Am J Trop*  
34 *Med Hyg*. 2021. doi:10.4269/ajtmh.20-1420  
35  
36
- 37 56. AAAAI. Spirometry during COVID-19. In: American Academy of Allergy, Asthma &  
38 Immunology [Internet]. 23 Apr 2020 [cited 25 Jan 2021]. Available:  
39 <https://www.aaaai.org/ask-the-expert/spirometry>  
40  
41
- 42 57. Stanojevic S, Beaucage F, Comondore V, Faughnan M, Kovesi T, McCoy C, et al.  
43 Resumption of pulmonary function testing during the post-peak phase of the  
44 COVID-19 pandemic. *Canadian Journal of Respiratory, Critical Care, and Sleep*  
45 *Medicine*. 2020. pp. 156–159. doi:10.1080/24745332.2020.1796211  
46  
47
- 48 58. McGowan A, Sylvester K, Burgos F, Boros P, de Jongh F, Kendrick A, et al.  
49 Recommendation from ERS Group 9.1 (Respiratory function  
50 technologists/Scientists) Lung function testing during COVID-19 pandemic and  
51 beyond. ; 2020 [accessed 2020 Aug 31]. In: European Respiratory Society  
52 [Internet]. [cited 18 Jul 2020]. Available:  
53 <https://ers.app.box.com/s/zs1uu88wy51monr0ewd990itoz4tsn2h>  
54  
55
- 56 59. Vittinghoff E, McCulloch CE. Relaxing the rule of ten events per variable in  
57 logistic and Cox regression. *Am J Epidemiol*. 2007;165: 710–718.  
58
- 59 60. Peduzzi P, Concato J, Kemper E, Holford TR, Feinstein AR. A simulation study of  
60

1  
2  
3  
4 the number of events per variable in logistic regression analysis. *J Clin Epidemiol*.  
5 1996;49: 1373–1379.  
6

- 7  
8 61. Concato J, Peduzzi P, Holford TR, Feinstein AR. Importance of events per  
9 independent variable in proportional hazards analysis. I. Background, goals, and  
10 general strategy. *J Clin Epidemiol*. 1995;48: 1495–1501.  
11  
12 62. Peduzzi P, Concato J, Feinstein AR, Holford TR. Importance of events per  
13 independent variable in proportional hazards regression analysis. II. Accuracy  
14 and precision of regression estimates. *J Clin Epidemiol*. 1995;48: 1503–1510.  
15  
16  
17 63. White IR, Royston P, Wood AM. Multiple imputation using chained equations:  
18 Issues and guidance for practice. *Stat Med*. 2011;30: 377–399.  
19  
20 64. White IR, Royston P. Imputing missing covariate values for the Cox model. *Stat*  
21 *Med*. 2009;28: 1982–1998.  
22  
23 65. Royston P, Altman DG. External validation of a Cox prognostic model: principles  
24 and methods. *BMC Med Res Methodol*. 2013;13: 33.  
25  
26  
27 66. Ahanchian H, Jones CM, Chen YS, Sly PD.  
28 Respiratory viral infections in children with asthma: do they matter and can  
29 we prevent them? *BMC Pediatr* 2012;12:147.  
30  
31  
32 67. Influenza and other respiratory viruses.  
33 <https://www.paho.org/en/topics/influenza-and-other-respiratory-viruses>  
34  
35  
36  
37

38 **Author statement:** Study design – PJC, AAC, NR, MB, MP, CA-G; study conduct – DM,  
39 SM-B, AO, MEC, CR, AM, KA, AR, CF, JA, KS; manuscript drafting – PJC, DM, SM-B;  
40 statistical analysis plan – ICS; manuscript editing and review – all authors.  
41  
42  
43  
44

45 **Funding:** This work is based on the Asthma Attacks Causes and Prevention Study in  
46 Urban Latin America which is funded by the National Institute of Health Research  
47 [NIHR] under the Global Health Research Programme [grant 17/63/62]. Additional  
48 financial support was provided by the Corporación Ecuatoriana para el Desarrollo de  
49 la Investigación y la Academia CEDIA [N° CEPRA-XV-2021-03].  
50  
51  
52  
53  
54  
55

56 **Competing Interests statement:** The authors declare no competing interests.  
57  
58  
59  
60



1  
2  
3  
4 **Patient and public involvement statement:** There was no patient or public  
5 involvement in the design or conduct of this study. Results of tests are being provided  
6 at the time of testing and the study population is being informed of study results  
7 through periodic leaflets, a website, social media texts and videos, and study group  
8 online meetings.  
9  
10  
11  
12  
13  
14  
15  
16  
17  
18  
19  
20  
21  
22  
23  
24  
25  
26  
27  
28  
29  
30  
31  
32  
33  
34  
35  
36  
37  
38  
39  
40  
41  
42  
43  
44  
45  
46  
47  
48  
49  
50  
51  
52  
53  
54  
55  
56  
57  
58  
59  
60



Figure 1

152x107mm (144 x 144 DPI)



Figure 2

408x217mm (160 x 160 DPI)
